# Supplementary material for: Whole Genome Sequence Analysis Reveals Lower Diversity and Frequency of Acquired Antimicrobial Resistance (AMR) Genes in E. coli From Dairy Herds Compared With Human Isolates From the Same Region of Central Zambia
Source: Front Microbiol. 2019 May 31;10:1114. doi: 10.3389/fmicb.2019.01114 (PMC6555227; doi:10.3389/fmicb.2019.01114)
Supplement: Supplementary file 3 [file Data_Sheet_3.csv]

Uberstrain ID Data Source(Accession No.+ADs-Sequencing Platform+ADs-Sequencing Library+ADs-Insert Size+ADs-Experiment+ADs-Status) Source Niche Source Type Collection Year Collection Month Collection Day Collection Time Continent Country Region District City Post Code Latitude Longitude Lab Contact Species Serological Group Serotype EcoR Cluster Pathogen/Non pathogen Simple Patho Antibiotic Resist…
1+AC0-110+AC0-08+AF8-S1+AF8-C2 SRR1186474+ADs-ILLUMINA+ADs-Paired+ADs-491+ADs-SRX483835 Human Human stool+ADs- Homo sapiens 2009 1 Africa Tanzania University of Maryland Institute for Genome Sciences Escherichia coli PRJNA233734 SRP039654 SAMN02680152 SRS568148 2015+AC0-08+AC0-27 2014+AC0-03+AC0-10 ESC+AF8-BA8568AA Assembled NaN 190518 4821428 Escherichia coli / Shigella+ADs-95.97+ACU- 135 1799 E…
1+AC0-110+AC0-08+AF8-S1+AF8-C3 SRR1186746+ADs-ILLUMINA+ADs-Paired+ADs-430+ADs-SRX484038 Human Human stool+ADs- Homo sapiens 2009 1 Africa Tanzania University of Maryland Institute for Genome Sciences Escherichia coli PRJNA233761 SRP039794 SAMN02687495 SRS568343 2015+AC0-08+AC0-27 2014+AC0-03+AC0-10 ESC+AF8-BA8433AA Assembled NaN 130550 4781980 Escherichia coli / Shigella+ADs-97.43+ACU- 140 1041 E…
1+AC0-110+AC0-08+AF8-S3+AF8-C1 SRR1186483+ADs-ILLUMINA+ADs-Paired+ADs-546+ADs-SRX483843	SRR1186482+ADs-ILLUMINA+ADs-Paired+ADs-546+ADs-SRX483844 Human Human stool+ADs- Homo sapiens 2009 4 Africa Tanzania University of Maryland Institute for Genome Sciences Escherichia coli PRJNA233789 SRP039661 SAMN02680160 SRS568156 2015+AC0-08+AC0-27 2014+AC0-03+AC0-10 ESC+AF8-BA8561AA Assembled NaN 125305 5307703 Escherichia coli / Shigella+ADs-98.83+ACU- 190 4311 ESC+AF8-FA7216AA+AF8-AS 2.2
1+AC0-110+AC0-08+AF8-S3+AF8-C2 SRR1186466+ADs-ILLUMINA+ADs-Paired+ADs-476+ADs-SRX483827 Human Human stool+ADs- Homo sapiens 2009 4 Africa Tanzania University of Maryland Institute for Genome Sciences Escherichia coli PRJNA233817 SRP039646 SAMN02680144 SRS568140 2015+AC0-08+AC0-27 2014+AC0-03+AC0-10 ESC+AF8-BA8576AA Assembled NaN 147614 5324193 Escherichia coli / Shigella+ADs-97.02+ACU- 201 2368 E…
1+AC0-110+AC0-08+AF8-S3+AF8-C3 SRR1186495+ADs-ILLUMINA+ADs-Paired+ADs-518+ADs-SRX483856 Human Human stool+ADs- Homo sapiens 2009 4 Africa Tanzania University of Maryland Institute for Genome Sciences Escherichia coli PRJNA233847 SRP039672 SAMN02680172 SRS568168 2015+AC0-08+AC0-27 2014+AC0-03+AC0-10 ESC+AF8-BA8550AA Assembled NaN 147614 5317979 Escherichia coli / Shigella+ADs-96.29+ACU- 185 3018 E…
1+AC0-110+AC0-08+AF8-S4+AF8-C1 SRR1186642+ADs-ILLUMINA+ADs-Paired+ADs-505+ADs-SRX483941 Human Human stool+ADs- Homo sapiens 2009 7 Africa Tanzania University of Maryland Institute for Genome Sciences Escherichia coli PRJNA233872 SRP039717 SAMN02680218 SRS568248 2015+AC0-08+AC0-27 2014+AC0-03+AC0-10 ESC+AF8-BA8508AA Assembled NaN 147888 5226336 Escherichia coli / Shigella+ADs-95.37+ACU- 219 3306 E…
1+AC0-110+AC0-08+AF8-S4+AF8-C2 SRR1186621+ADs-ILLUMINA+ADs-Paired+ADs-504+ADs-SRX483921 Human Human stool+ADs- Homo sapiens 2009 7 Africa Tanzania University of Maryland Institute for Genome Sciences Escherichia coli PRJNA233900 SRP039699 SAMN02680199 SRS568229 2015+AC0-08+AC0-27 2014+AC0-03+AC0-10 ESC+AF8-BA8526AA Assembled NaN 93405 4990487 Escherichia coli / Shigella+ADs-96.45+ACU- 177 2225 ES…
1+AC0-110+AC0-08+AF8-S4+AF8-C3 SRR1186730+ADs-ILLUMINA+ADs-Paired+ADs-503+ADs-SRX484022 Human Human stool+ADs- Homo sapiens 2009 7 Africa Tanzania University of Maryland Institute for Genome Sciences Escherichia coli PRJNA233929 SRP039779 SAMN02687480 SRS568328 2015+AC0-08+AC0-27 2014+AC0-03+AC0-10 ESC+AF8-BA8448AA Assembled NaN 93405 5008867 Escherichia coli / Shigella+ADs-96.6+ACU- 181 2780 ESC…
1+AC0-176+AC0-05+AF8-S1+AF8-C1 SRR1186802+ADs-ILLUMINA+ADs-Paired+ADs-485+ADs-SRX484091 Human Human stool+ADs- Homo sapiens 2009 1 Africa Tanzania University of Maryland Institute for Genome Sciences Escherichia coli PRJNA233707 SRP039841 SAMN02687542 SRS568397 2015+AC0-08+AC0-27 2014+AC0-03+AC0-10 ESC+AF8-BA8386AA Assembled NaN 119494 4944171 Escherichia coli / Shigella+ADs-97.83+ACU- 163 2225 E…
1+AC0-176+AC0-05+AF8-S1+AF8-C2 SRR1186396+ADs-ILLUMINA+ADs-Paired+ADs-519+ADs-SRX483762 Human Human stool+ADs- Homo sapiens 2009 1 Africa Tanzania University of Maryland Institute for Genome Sciences Escherichia coli PRJNA233735 SRP039634 SAMN02680133 SRS568076 2015+AC0-08+AC0-27 2014+AC0-03+AC0-10 ESC+AF8-BA8586AA Assembled NaN 119494 4979966 Escherichia coli / Shigella+ADs-98.56+ACU- 163 1907 E…
1+AC0-176+AC0-05+AF8-S1+AF8-C3 SRR1186755+ADs-ILLUMINA+ADs-Paired+ADs-458+ADs-SRX484045 Human Human stool+ADs- Homo sapiens 2009 1 Africa Tanzania University of Maryland Institute for Genome Sciences Escherichia coli PRJNA233762 SRP039800 SAMN02687501 SRS568351 2015+AC0-08+AC0-27 2014+AC0-03+AC0-10 ESC+AF8-BA8427AA Assembled NaN 121909 4965467 Escherichia coli / Shigella+ADs-99.28+ACU- 161 1367 E…
1+AC0-176+AC0-05+AF8-S3+AF8-C1 SRR1186660+ADs-ILLUMINA+ADs-Paired+ADs-421+ADs-SRX483958 Human Human stool+ADs- Homo sapiens 2009 4 Africa Tanzania University of Maryland Institute for Genome Sciences Escherichia coli PRJNA233790 SRP039732 SAMN02680233 SRS568264 2015+AC0-08+AC0-27 2014+AC0-03+AC0-10 ESC+AF8-BA8493AA Assembled NaN 82620 5124070 Escherichia coli / Shigella+ADs-98.16+ACU- 238 2369 ES…
1+AC0-176+AC0-05+AF8-S3+AF8-C2 SRR1186783+ADs-ILLUMINA+ADs-Paired+ADs-438+ADs-SRX484073 Human Human stool+ADs- Homo sapiens 2009 4 Africa Tanzania University of Maryland Institute for Genome Sciences Escherichia coli PRJNA233818 SRP039828 SAMN02687529 SRS568379 2015+AC0-08+AC0-27 2014+AC0-03+AC0-10 ESC+AF8-BA8399AA Assembled NaN 531315 4366404 Escherichia coli / Shigella+ADs-88.89+ACU- 31 464 ESC…
1+AC0-176+AC0-05+AF8-S4+AF8-C1 SRR1186756+ADs-ILLUMINA+ADs-Paired+ADs-436+ADs-SRX484046 Human Human stool+ADs- Homo sapiens 2009 7 Africa Tanzania University of Maryland Institute for Genome Sciences Escherichia coli PRJNA233873 SRP039801 SAMN02687502 SRS568352 2015+AC0-08+AC0-27 2014+AC0-03+AC0-10 ESC+AF8-BA8426AA Assembled NaN 90743 5000663 Escherichia coli / Shigella+ADs-97.29+ACU- 197 1561 ES…
1+AC0-176+AC0-05+AF8-S4+AF8-C2 SRR1186491+ADs-ILLUMINA+ADs-Paired+ADs-445+ADs-SRX483852 Human Human Homo sapiens+ADs- stool 2009 7 Africa Tanzania University of Maryland Institute for Genome Sciences Escherichia coli PRJNA233901 SRP039669 SAMN02680168 SRS568164 2015+AC0-08+AC0-27 2014+AC0-03+AC0-10 ESC+AF8-BA8553AA Assembled NaN 90743 4911338 Escherichia coli / Shigella+ADs-97.51+ACU- 179 1806 ES…
1+AC0-176+AC0-05+AF8-S4+AF8-C3 SRR1186347+ADs-ILLUMINA+ADs-Paired+ADs-433+ADs-SRX483708 Human Human stool+ADs- Homo sapiens 2009 7 Africa Tanzania University of Maryland Institute for Genome Sciences Escherichia coli PRJNA233930 SRP039616 SAMN02680094 SRS568019 2015+AC0-08+AC0-27 2014+AC0-03+AC0-10 ESC+AF8-BA8604AA Assembled NaN 90743 5001860 Escherichia coli / Shigella+ADs-97.21+ACU- 199 1820 ES…
1+AC0-182+AC0-04+AF8-S1+AF8-C1 SRR1186771+ADs-ILLUMINA+ADs-Paired+ADs-431+ADs-SRX484061 Human Human stool+ADs- Homo sapiens 2009 1 Africa Tanzania University of Maryland Institute for Genome Sciences Escherichia coli PRJNA233708 SRP039816 SAMN02687517 SRS568367 2015+AC0-08+AC0-27 2014+AC0-03+AC0-10 ESC+AF8-BA8411AA Assembled NaN 337228 4931963 Escherichia coli / Shigella+ADs-94.92+ACU- 82 1983 ES…
1+AC0-182+AC0-04+AF8-S1+AF8-C2 SRR1186742+ADs-ILLUMINA+ADs-Paired+ADs-496+ADs-SRX484034 Human Human Homo sapiens+ADs- stool 2009 1 Africa Tanzania University of Maryland Institute for Genome Sciences Escherichia coli PRJNA233736 SRP039791 SAMN02687492 SRS568340 2015+AC0-08+AC0-27 2014+AC0-03+AC0-10 ESC+AF8-BA8436AA Assembled NaN 427181 4655851 Escherichia coli / Shigella+ADs-100.0+ACU- 58 1235 ES…
1+AC0-182+AC0-04+AF8-S1+AF8-C3 SRR1186468+ADs-ILLUMINA+ADs-Paired+ADs-443+ADs-SRX483829 Human Human stool+ADs- Homo sapiens 2009 1 Africa Tanzania University of Maryland Institute for Genome Sciences Escherichia coli PRJNA233763 SRP039648 SAMN02680146 SRS568142 2015+AC0-08+AC0-27 2014+AC0-03+AC0-10 ESC+AF8-BA8574AA Assembled NaN 415764 4947238 Escherichia coli / Shigella+ADs-94.54+ACU- 72 1453 ES…
1+AC0-182+AC0-04+AF8-S3+AF8-C1 SRR1186733+ADs-ILLUMINA+ADs-Paired+ADs-566+ADs-SRX484025 Human Human stool+ADs- Homo sapiens 2009 4 Africa Tanzania University of Maryland Institute for Genome Sciences Escherichia coli PRJNA233791 SRP039782 SAMN02687483 SRS568331 2015+AC0-08+AC0-27 2014+AC0-03+AC0-10 ESC+AF8-BA8445AA Assembled NaN 39117 4865469 Escherichia coli / Shigella+ADs-97.75+ACU- 298 1944 ES…
1+AC0-182+AC0-04+AF8-S3+AF8-C2 SRR1186643+ADs-ILLUMINA+ADs-Paired+ADs-558+ADs-SRX483942 Human Human stool+ADs- Homo sapiens 2009 4 Africa Tanzania University of Maryland Institute for Genome Sciences Escherichia coli PRJNA233819 SRP039718 SAMN02680219 SRS568249 2015+AC0-08+AC0-27 2014+AC0-03+AC0-10 ESC+AF8-BA8507AA Assembled NaN 39638 4775247 Escherichia coli / Shigella+ADs-97.56+ACU- 268 2110 ES…
1+AC0-182+AC0-04+AF8-S3+AF8-C3 SRR1186485+ADs-ILLUMINA+ADs-Paired+ADs-542+ADs-SRX483846 Human Human stool+ADs- Homo sapiens 2009 4 Africa Tanzania University of Maryland Institute for Genome Sciences Escherichia coli PRJNA233848 SRP039663 SAMN02680162 SRS568158 2015+AC0-08+AC0-27 2014+AC0-03+AC0-10 ESC+AF8-BA8559AA Assembled NaN 40723 4854894 Escherichia coli / Shigella+ADs-96.47+ACU- 281 2075 ES…
1+AC0-182+AC0-04+AF8-S4+AF8-C1 SRR1186638+ADs-ILLUMINA+ADs-Paired+ADs-550+ADs-SRX483937 Human Human stool+ADs- Homo sapiens 2009 7 Africa Tanzania University of Maryland Institute for Genome Sciences Escherichia coli PRJNA233874 SRP039713 SAMN02680214 SRS568244 2015+AC0-08+AC0-27 2014+AC0-03+AC0-10 ESC+AF8-BA8512AA Assembled NaN 103943 4888913 Escherichia coli / Shigella+ADs-99.08+ACU- 123 35531 …
1+AC0-182+AC0-04+AF8-S4+AF8-C2 SRR1186734+ADs-ILLUMINA+ADs-Paired+ADs-390+ADs-SRX484026 Human Human stool+ADs- Homo sapiens 2009 7 Africa Tanzania University of Maryland Institute for Genome Sciences Escherichia coli PRJNA233902 SRP039783 SAMN02687484 SRS568332 2015+AC0-08+AC0-27 2014+AC0-03+AC0-10 ESC+AF8-BA8444AA Assembled NaN 188063 5012111 Escherichia coli / Shigella+ADs-95.5+ACU- 145 1599 ES…
1+AC0-182+AC0-04+AF8-S4+AF8-C3 SRR1186356+ADs-ILLUMINA+ADs-Paired+ADs-388+ADs-SRX483718 Human Human stool+ADs- Homo sapiens 2009 7 Africa Tanzania University of Maryland Institute for Genome Sciences Escherichia coli PRJNA233931 SRP039624 SAMN02680104 SRS568031 2015+AC0-08+AC0-27 2014+AC0-03+AC0-10 ESC+AF8-BA8596AA Assembled NaN 183379 5007846 Escherichia coli / Shigella+ADs-95.74+ACU- 151 1874 E…
1+AC0-250+AC0-04+AF8-S1+AF8-C1 SRR1186350+ADs-ILLUMINA+ADs-Paired+ADs-410+ADs-SRX483711 Human Human stool+ADs- Homo sapiens 2009 1 Africa Tanzania University of Maryland Institute for Genome Sciences Escherichia coli PRJNA233709 SRP039619 SAMN02680097 SRS568022 2015+AC0-08+AC0-27 2014+AC0-03+AC0-10 ESC+AF8-BA8601AA Assembled NaN 146247 5036064 Escherichia coli / Shigella+ADs-98.56+ACU- 157 1686 E…
1+AC0-250+AC0-04+AF8-S1+AF8-C2 SRR1186648+ADs-ILLUMINA+ADs-Paired+ADs-376+ADs-SRX483947 Human Human stool+ADs- Homo sapiens 2009 1 Africa Tanzania University of Maryland Institute for Genome Sciences Escherichia coli PRJNA233737 SRP039723 SAMN02680224 SRS568254 2015+AC0-08+AC0-27 2014+AC0-03+AC0-10 ESC+AF8-BA8502AA Assembled NaN 208020 5031565 Escherichia coli / Shigella+ADs-99.27+ACU- 152 1900 E…
1+AC0-250+AC0-04+AF8-S1+AF8-C3 SRR1186486+ADs-ILLUMINA+ADs-Paired+ADs-288+ADs-SRX483847 Human Human stool+ADs- Homo sapiens 2009 1 Africa Tanzania University of Maryland Institute for Genome Sciences Escherichia coli PRJNA233764 SRP039664 SAMN02680163 SRS568159 2015+AC0-08+AC0-27 2014+AC0-03+AC0-10 ESC+AF8-BA8558AA Assembled NaN 142822 5028525 Escherichia coli / Shigella+ADs-100.0+ACU- 164 1710 E…
1+AC0-250+AC0-04+AF8-S3+AF8-C1 SRR1186681+ADs-ILLUMINA+ADs-Paired+ADs-393+ADs-SRX483978 Human Human stool+ADs- Homo sapiens 2009 4 Africa Tanzania University of Maryland Institute for Genome Sciences Escherichia coli PRJNA233792 SRP039752 SAMN02680253 SRS568284 2015+AC0-08+AC0-27 2014+AC0-03+AC0-10 ESC+AF8-BA8473AA Assembled NaN 74840 4995726 Escherichia coli / Shigella+ADs-96.58+ACU- 201 1374 ES…
1+AC0-250+AC0-04+AF8-S3+AF8-C2 SRR1191647+ADs-ILLUMINA+ADs-Paired+ADs-396+ADs-SRX488728 Human Human stool+ADs- Homo sapiens 2009 4 Africa Tanzania University of Maryland Institute for Genome Sciences Escherichia coli PRJNA233820 SRP040088 SAMN02689029 SRS572002 2015+AC0-08+AC0-27 2014+AC0-03+AC0-13 ESC+AF8-BA8360AA Assembled NaN 79456 5000990 Escherichia coli / Shigella+ADs-96.73+ACU- 205 1317 ES…
1+AC0-250+AC0-04+AF8-S4+AF8-C1 SRR1186521+ADs-ILLUMINA+ADs-Paired+ADs-385+ADs-SRX483882 Human Human stool+ADs- Homo sapiens 2009 7 Africa Tanzania University of Maryland Institute for Genome Sciences Escherichia coli PRJNA233875 SRP039681 SAMN02680180 SRS568193 2015+AC0-08+AC0-27 2014+AC0-03+AC0-10 ESC+AF8-BA8542AA Assembled NaN 129563 5098226 Escherichia coli / Shigella+ADs-98.1+ACU- 260 2157 ES…
1+AC0-250+AC0-04+AF8-S4+AF8-C2 SRR1186797+ADs-ILLUMINA+ADs-Paired+ADs-399+ADs-SRX484086 Human Human stool+ADs- Homo sapiens 2009 7 Africa Tanzania University of Maryland Institute for Genome Sciences Escherichia coli PRJNA233903 SRP039836 SAMN02687537 SRS568392 2015+AC0-08+AC0-27 2014+AC0-03+AC0-10 ESC+AF8-BA8391AA Assembled NaN 129563 5091056 Escherichia coli / Shigella+ADs-98.04+ACU- 255 2190 E…
1+AC0-392+AC0-07+AF8-S1+AF8-C1 SRR1186352+ADs-ILLUMINA+ADs-Paired+ADs-302+ADs-SRX483713 Human Human stool+ADs- Homo sapiens 2009 1 Africa Tanzania University of Maryland Institute for Genome Sciences Escherichia coli PRJNA233710 SRP039620 SAMN02680099 SRS568024 2015+AC0-08+AC0-27 2014+AC0-03+AC0-10 ESC+AF8-BA8600AA Assembled NaN 155710 5349781 Escherichia coli / Shigella+ADs-96.27+ACU- 203 2600 E…
1+AC0-392+AC0-07+AF8-S1+AF8-C2 SRR1186709+ADs-ILLUMINA+ADs-Paired+ADs-400+ADs-SRX484004 Human Human stool+ADs- Homo sapiens 2009 1 Africa Tanzania University of Maryland Institute for Genome Sciences Escherichia coli PRJNA233738 SRP039761 SAMN02680262 SRS568304 2015+AC0-08+AC0-27 2014+AC0-03+AC0-10 ESC+AF8-BA8464AA Assembled NaN 157924 5347392 Escherichia coli / Shigella+ADs-95.81+ACU- 186 2287 E…
1+AC0-392+AC0-07+AF8-S3+AF8-C1 SRR1186772+ADs-ILLUMINA+ADs-Paired+ADs-359+ADs-SRX484062 Human Human stool+ADs- Homo sapiens 2009 4 Africa Tanzania University of Maryland Institute for Genome Sciences Escherichia coli PRJNA233793 SRP039817 SAMN02687518 SRS568368 2015+AC0-08+AC0-27 2014+AC0-03+AC0-10 ESC+AF8-BA8410AA Assembled NaN 52651 4763239 Escherichia coli / Shigella+ADs-98.71+ACU- 243 1722 ES…
1+AC0-392+AC0-07+AF8-S3+AF8-C2 SRR1186481+ADs-ILLUMINA+ADs-Paired+ADs-374+ADs-SRX483842 Human Human stool+ADs- Homo sapiens 2009 4 Africa Tanzania University of Maryland Institute for Genome Sciences Escherichia coli PRJNA233821 SRP039660 SAMN02680159 SRS568155 2015+AC0-08+AC0-27 2014+AC0-03+AC0-10 ESC+AF8-BA8562AA Assembled NaN 52651 4773052 Escherichia coli / Shigella+ADs-98.29+ACU- 248 1623 ES…
1+AC0-392+AC0-07+AF8-S3+AF8-C3 SRR1186728+ADs-ILLUMINA+ADs-Paired+ADs-384+ADs-SRX484020 Human Human stool+ADs- Homo sapiens 2009 4 Africa Tanzania University of Maryland Institute for Genome Sciences Escherichia coli PRJNA233849 SRP039777 SAMN02687478 SRS568326 2015+AC0-08+AC0-27 2014+AC0-03+AC0-10 ESC+AF8-BA8450AA Assembled NaN 55040 4766263 Escherichia coli / Shigella+ADs-98.26+ACU- 246 2402 ES…
1+AC0-392+AC0-07+AF8-S4+AF8-C1 SRR1191648+ADs-ILLUMINA+ADs-Paired+ADs-319+ADs-SRX488729 Human Human stool+ADs- Homo sapiens 2009 7 Africa Tanzania University of Maryland Institute for Genome Sciences Escherichia coli PRJNA233876 SRP040089 SAMN02689030 SRS572003 2015+AC0-08+AC0-27 2014+AC0-03+AC0-13 ESC+AF8-BA8359AA Assembled NaN 115622 5641969 Escherichia coli / Shigella+ADs-98.85+ACU- 583 3662 E…
1+AC0-392+AC0-07+AF8-S4+AF8-C2 SRR1186748+ADs-ILLUMINA+ADs-Paired+ADs-304+ADs-SRX484039 Human Human stool+ADs- Homo sapiens 2009 7 Africa Tanzania University of Maryland Institute for Genome Sciences Escherichia coli PRJNA233904 SRP039795 SAMN02687496 SRS568345 2015+AC0-08+AC0-27 2014+AC0-03+AC0-10 ESC+AF8-BA8432AA Assembled NaN 196493 5014988 Escherichia coli / Shigella+ADs-98.16+ACU- 134 1190 E…
1+AC0-392+AC0-07+AF8-S4+AF8-C3 SRR1191649+ADs-ILLUMINA+ADs-Paired+ADs-378+ADs-SRX488730 Human Human stool+ADs- Homo sapiens 2009 7 Africa Tanzania University of Maryland Institute for Genome Sciences Escherichia coli PRJNA233932 SRP040090 SAMN02689031 SRS572004 2015+AC0-08+AC0-27 2014+AC0-03+AC0-13 ESC+AF8-BA8358AA Assembled NaN 111603 5645154 Escherichia coli / Shigella+ADs-98.56+ACU- 562 4391 E…
164 traces+AC0-0aKOUvU+ADs-ILLUMINA+ADs-Paired+ADsAOw-NA Human Africa Tanzania Mafisa Egle Kudirkiene	University of Copenhagen Escherichia coli 2016+AC0-08+AC0-22 2017+AC0-02+AC0-24 ESC+AF8-EA4193AA Assembled 54 86133 5294424 Escherichia coli / Shigella+ADs-100.0+ACU- 255 7767 ESC+AF8-IA0254AA+AF8-AS 3.51
167 traces+AC0-0LSrTkH+ADs-ILLUMINA+ADs-Paired+ADsAOw-NA Human Africa Tanzania Magadu Egle Kudirkiene	University of Copenhagen Escherichia coli 2016+AC0-08+AC0-22 2017+AC0-02+AC0-24 ESC+AF8-EA4194AA Assembled 73 75489 4801935 Escherichia coli / Shigella+ADs-89.58+ACU- 210 4407 ESC+AF8-IA0255AA+AF8-AS 3.51
172 traces+AC0-0OfcNBB+ADs-ILLUMINA+ADs-Paired+ADsAOw-NA Human Africa Tanzania Mafisa Egle Kudirkiene	University of Copenhagen Escherichia coli 2016+AC0-08+AC0-22 2017+AC0-02+AC0-24 ESC+AF8-EA4195AA Assembled 63 76584 4817888 Escherichia coli / Shigella+ADs-97.39+ACU- 153 8032 ESC+AF8-IA0256AA+AF8-AS 3.51
177 traces+AC0-0DtCKEM+ADs-ILLUMINA+ADs-Paired+ADsAOw-NA Human Africa Tanzania Kihonda Egle Kudirkiene	University of Copenhagen Escherichia coli 2016+AC0-08+AC0-22 2017+AC0-02+AC0-24 ESC+AF8-EA4197AA Assembled 69 65532 4794126 Escherichia coli / Shigella+ADs-91.47+ACU- 239 9705 ESC+AF8-IA0258AA+AF8-AS 3.51
180 traces+AC0-0JkqagE+ADs-ILLUMINA+ADs-Paired+ADsAOw-NA Human Africa Tanzania Magadu Egle Kudirkiene	University of Copenhagen Escherichia coli 2016+AC0-08+AC0-22 2017+AC0-02+AC0-24 ESC+AF8-EA4196AA Assembled 59 104537 5158696 Escherichia coli / Shigella+ADs-99.3+ACU- 209 6795 ESC+AF8-IA0257AA+AF8-AS 3.51
181 traces+AC0-0hAbpwK+ADs-ILLUMINA+ADs-Paired+ADsAOw-NA Human Africa Tanzania Mafisa Egle Kudirkiene	University of Copenhagen Escherichia coli 2016+AC0-08+AC0-22 2017+AC0-02+AC0-24 ESC+AF8-EA4198AA Assembled 23 110947 4632226 Escherichia coli / Shigella+ADs-94.35+ACU- 123 20209 ESC+AF8-IA0259AA+AF8-AS 3.51
185 traces+AC0-0ovTTtl+ADs-ILLUMINA+ADs-Paired+ADsAOw-NA Human Africa Tanzania Magadu Egle Kudirkiene	University of Copenhagen Escherichia coli 2016+AC0-08+AC0-22 2017+AC0-02+AC0-24 ESC+AF8-EA4199AA Assembled 53 120905 5122336 Escherichia coli / Shigella+ADs-100.0+ACU- 175 7366 ESC+AF8-IA0260AA+AF8-AS 3.51
187 traces+AC0-0Paoutl+ADs-ILLUMINA+ADs-Paired+ADsAOw-NA Human Africa Tanzania Magadu Egle Kudirkiene	University of Copenhagen Escherichia coli 2016+AC0-08+AC0-22 2017+AC0-02+AC0-24 ESC+AF8-EA4200AA Assembled 61 79805 4795622 Escherichia coli / Shigella+ADs-88.46+ACU- 204 5662 ESC+AF8-IA0261AA+AF8-AS 3.51
189 traces+AC0-0wZhmvD+ADs-ILLUMINA+ADs-Paired+ADsAOw-NA Human Africa Tanzania Mafisa Egle Kudirkiene	University of Copenhagen Escherichia coli 2016+AC0-08+AC0-22 2017+AC0-02+AC0-24 ESC+AF8-EA4201AA Assembled 60 104537 5030575 Escherichia coli / Shigella+ADs-98.55+ACU- 190 6003 ESC+AF8-IA0262AA+AF8-AS 3.51
191 traces+AC0-0YaSkyD+ADs-ILLUMINA+ADs-Paired+ADsAOw-NA Human Africa Tanzania Kihonda Egle Kudirkiene	University of Copenhagen Escherichia coli 2016+AC0-08+AC0-22 2017+AC0-02+AC0-24 ESC+AF8-EA4203AA Assembled 58 100599 5163250 Escherichia coli / Shigella+ADs-100.0+ACU- 271 12430 ESC+AF8-IA0264AA+AF8-AS 3.51
2+AC0-005+AC0-03+AF8-S1+AF8-C1 SRR1186676+ADs-ILLUMINA+ADs-Paired+ADs-387+ADs-SRX483973 Human Human stool+ADs- Homo sapiens 2009 1 Africa Tanzania University of Maryland Institute for Genome Sciences Escherichia coli PRJNA233693 SRP039747 SAMN02680248 SRS568279 2015+AC0-08+AC0-27 2014+AC0-03+AC0-10 ESC+AF8-BA8478AA Assembled NaN 151195 5099442 Escherichia coli / Shigella+ADs-97.69+ACU- 211 2085 E…
2+AC0-005+AC0-03+AF8-S1+AF8-C2 SRR1186471+ADs-ILLUMINA+ADs-Paired+ADs-409+ADs-SRX483832 Human Human stool+ADs- Homo sapiens 2009 1 Africa Tanzania University of Maryland Institute for Genome Sciences Escherichia coli PRJNA233721 SRP039651 SAMN02680149 SRS568145 2015+AC0-08+AC0-27 2014+AC0-03+AC0-10 ESC+AF8-BA8571AA Assembled NaN 210521 5095955 Escherichia coli / Shigella+ADs-98.57+ACU- 172 2370 E…
2+AC0-005+AC0-03+AF8-S1+AF8-C3 SRR1186492+ADs-ILLUMINA+ADs-Paired+ADs-388+ADs-SRX483853 Human Human stool+ADs- Homo sapiens 2009 1 Africa Tanzania University of Maryland Institute for Genome Sciences Escherichia coli PRJNA233749 SRP039670 SAMN02680169 SRS568165 2015+AC0-08+AC0-27 2014+AC0-03+AC0-10 ESC+AF8-BA8552AA Assembled NaN 143088 5099092 Escherichia coli / Shigella+ADs-97.47+ACU- 198 1811 E…
2+AC0-005+AC0-03+AF8-S3+AF8-C1 SRR1186729+ADs-ILLUMINA+ADs-Paired+ADs-382+ADs-SRX484021 Human Human stool+ADs- Homo sapiens 2009 4 Africa Tanzania University of Maryland Institute for Genome Sciences Escherichia coli PRJNA233774 SRP039778 SAMN02687479 SRS568327 2015+AC0-08+AC0-27 2014+AC0-03+AC0-10 ESC+AF8-BA8449AA Assembled NaN 119400 5173727 Escherichia coli / Shigella+ADs-99.22+ACU- 274 4063 E…
2+AC0-005+AC0-03+AF8-S3+AF8-C2 SRR1186402+ADs-ILLUMINA+ADs-Paired+ADs-408+ADs-SRX483766 Human Human Homo sapiens+ADs- stool 2009 4 Africa Tanzania University of Maryland Institute for Genome Sciences Escherichia coli PRJNA233804 SRP039638 SAMN02680137 SRS568080 2015+AC0-08+AC0-27 2014+AC0-03+AC0-10 ESC+AF8-BA8582AA Assembled NaN 167914 5179020 Escherichia coli / Shigella+ADs-98.91+ACU- 207 1551 E…
2+AC0-005+AC0-03+AF8-S3+AF8-C3 SRR1186758+ADs-ILLUMINA+ADs-Paired+ADs-377+ADs-SRX484048 Human Human stool+ADs- Homo sapiens 2009 4 Africa Tanzania University of Maryland Institute for Genome Sciences Escherichia coli PRJNA233832 SRP039803 SAMN02687504 SRS568354 2015+AC0-08+AC0-27 2014+AC0-03+AC0-10 ESC+AF8-BA8424AA Assembled NaN 119015 5173446 Escherichia coli / Shigella+ADs-98.7+ACU- 256 3623 ES…
2+AC0-005+AC0-03+AF8-S4+AF8-C1 SRR1186459+ADs-ILLUMINA+ADs-Paired+ADs-386+ADs-SRX483821 Human Human stool+ADs- Homo sapiens 2009 7 Africa Tanzania University of Maryland Institute for Genome Sciences Escherichia coli PRJNA233857 SRP039641 SAMN02680138 SRS568134 2015+AC0-08+AC0-27 2014+AC0-03+AC0-10 ESC+AF8-BA8581AA Assembled NaN 88586 5019293 Escherichia coli / Shigella+ADs-97.0+ACU- 287 3118 ESC…
2+AC0-005+AC0-03+AF8-S4+AF8-C2 SRR1186632+ADs-ILLUMINA+ADs-Paired+ADs-320+ADs-SRX483932 Human Human stool+ADs- Homo sapiens 2009 7 Africa Tanzania University of Maryland Institute for Genome Sciences Escherichia coli PRJNA233885 SRP039708 SAMN02680209 SRS568239 2015+AC0-08+AC0-27 2014+AC0-03+AC0-10 ESC+AF8-BA8517AA Assembled NaN 89954 5149678 Escherichia coli / Shigella+ADs-99.36+ACU- 305 2798 ES…
2+AC0-005+AC0-03+AF8-S4+AF8-C3 SRR1186743+ADs-ILLUMINA+ADs-Paired+ADs-363+ADs-SRX484035 Human Human stool+ADs- Homo sapiens 2009 7 Africa Tanzania University of Maryland Institute for Genome Sciences Escherichia coli PRJNA233915 SRP039792 SAMN02687493 SRS568341 2015+AC0-08+AC0-27 2014+AC0-03+AC0-10 ESC+AF8-BA8435AA Assembled NaN 104183 5144790 Escherichia coli / Shigella+ADs-99.65+ACU- 283 2686 E…
2+AC0-011+AC0-08+AF8-S1+AF8-C1 SRR1186710+ADs-ILLUMINA+ADs-Paired+ADs-430+ADs-SRX484005 Human Human Homo sapiens+ADs- stool 2009 1 Africa Tanzania University of Maryland Institute for Genome Sciences Escherichia coli PRJNA233694 SRP039762 SAMN02680263 SRS568305 2015+AC0-08+AC0-27 2014+AC0-03+AC0-10 ESC+AF8-BA8463AA Assembled NaN 145032 5204881 Escherichia coli / Shigella+ADs-91.83+ACU- 222 3387 E…
2+AC0-011+AC0-08+AF8-S1+AF8-C2 SRR1186711+ADs-ILLUMINA+ADs-Paired+ADs-408+ADs-SRX484006 Human Human stool+ADs- Homo sapiens 2009 1 Africa Tanzania University of Maryland Institute for Genome Sciences Escherichia coli PRJNA233722 SRP039763 SAMN02680264 SRS568306 2015+AC0-08+AC0-27 2014+AC0-03+AC0-10 ESC+AF8-BA8462AA Assembled NaN 143854 5130835 Escherichia coli / Shigella+ADs-96.11+ACU- 185 1017 E…
2+AC0-011+AC0-08+AF8-S1+AF8-C3 SRR1186595+ADs-ILLUMINA+ADs-Paired+ADs-379+ADs-SRX483894 Human Human stool+ADs- Homo sapiens 2009 1 Africa Tanzania University of Maryland Institute for Genome Sciences Escherichia coli PRJNA233750 SRP039690 SAMN02680189 SRS568205 2015+AC0-08+AC0-27 2014+AC0-03+AC0-10 ESC+AF8-BA8534AA Assembled NaN 100633 4834301 Escherichia coli / Shigella+ADs-97.52+ACU- 175 1697 E…
2+AC0-011+AC0-08+AF8-S3+AF8-C1 SRR1186353+ADs-ILLUMINA+ADs-Paired+ADs-385+ADs-SRX483715 Human Human stool+ADs- Homo sapiens 2009 4 Africa Tanzania University of Maryland Institute for Genome Sciences Escherichia coli PRJNA233775 SRP039621 SAMN02680101 SRS568026 2015+AC0-08+AC0-27 2014+AC0-03+AC0-10 ESC+AF8-BA8599AA Assembled NaN 119430 4994211 Escherichia coli / Shigella+ADs-97.73+ACU- 197 1855 E…
2+AC0-011+AC0-08+AF8-S3+AF8-C2 SRR1186773+ADs-ILLUMINA+ADs-Paired+ADs-388+ADs-SRX484063 Human Human Homo sapiens+ADs- stool 2009 4 Africa Tanzania University of Maryland Institute for Genome Sciences Escherichia coli PRJNA233805 SRP039818 SAMN02687519 SRS568369 2015+AC0-08+AC0-27 2014+AC0-03+AC0-10 ESC+AF8-BA8409AA Assembled NaN 88586 4978699 Escherichia coli / Shigella+ADs-97.32+ACU- 281 2356 ES…
2+AC0-011+AC0-08+AF8-S3+AF8-C3 SRR1186522+ADs-ILLUMINA+ADs-Paired+ADs-408+ADs-SRX483883 Human Human Homo sapiens+ADs- stool 2009 4 Africa Tanzania University of Maryland Institute for Genome Sciences Escherichia coli PRJNA233833 SRP039682 SAMN02680181 SRS568194 2015+AC0-08+AC0-27 2014+AC0-03+AC0-10 ESC+AF8-BA8541AA Assembled NaN 113185 4992538 Escherichia coli / Shigella+ADs-97.16+ACU- 193 1621 E…
2+AC0-011+AC0-08+AF8-S4+AF8-C1 SRR1186764+ADs-ILLUMINA+ADs-Paired+ADs-371+ADs-SRX484054 Human Human stool+ADs- Homo sapiens 2009 7 Africa Tanzania University of Maryland Institute for Genome Sciences Escherichia coli PRJNA233858 SRP039809 SAMN02687510 SRS568360 2015+AC0-08+AC0-27 2014+AC0-03+AC0-10 ESC+AF8-BA8418AA Assembled NaN 77033 4705530 Escherichia coli / Shigella+ADs-88.51+ACU- 192 1693 ES…
2+AC0-011+AC0-08+AF8-S4+AF8-C3 SRR1186349+ADs-ILLUMINA+ADs-Paired+ADs-385+ADs-SRX483710 Human Human stool+ADs- Homo sapiens 2009 7 Africa Tanzania University of Maryland Institute for Genome Sciences Escherichia coli PRJNA233916 SRP039618 SAMN02680096 SRS568021 2015+AC0-08+AC0-27 2014+AC0-03+AC0-10 ESC+AF8-BA8602AA Assembled NaN 76966 4681425 Escherichia coli / Shigella+ADs-88.24+ACU- 193 1196 ES…
201 traces+AC0-0CUPhom+ADs-ILLUMINA+ADs-Paired+ADsAOw-NA Human Africa Tanzania Kihonda Egle Kudirkiene	University of Copenhagen Escherichia coli 2016+AC0-08+AC0-22 2017+AC0-02+AC0-24 ESC+AF8-EA4202AA Assembled 59 45507 5198225 Escherichia coli / Shigella+ADs-98.23+ACU- 470 21109 ESC+AF8-IA0263AA+AF8-AS 3.51
2+AC0-052+AC0-05+AF8-S1+AF8-C1 SRR1186635+ADs-ILLUMINA+ADs-Paired+ADs-374+ADs-SRX483934 Human Human Homo sapiens+ADs- stool 2009 1 Africa Tanzania University of Maryland Institute for Genome Sciences Escherichia coli PRJNA233695 SRP039710 SAMN02680211 SRS568241 2015+AC0-08+AC0-27 2014+AC0-03+AC0-10 ESC+AF8-BA8515AA Assembled NaN 143088 5111551 Escherichia coli / Shigella+ADs-97.93+ACU- 234 2764 E…
2+AC0-052+AC0-05+AF8-S1+AF8-C3 SRR1186672+ADs-ILLUMINA+ADs-Paired+ADs-352+ADs-SRX483969 Human Human stool+ADs- Homo sapiens 2009 1 Africa Tanzania University of Maryland Institute for Genome Sciences Escherichia coli PRJNA233751 SRP039743 SAMN02680244 SRS568275 2015+AC0-08+AC0-27 2014+AC0-03+AC0-10 ESC+AF8-BA8482AA Assembled NaN 143088 5100506 Escherichia coli / Shigella+ADs-98.29+ACU- 225 2497 E…
2+AC0-052+AC0-05+AF8-S3+AF8-C1 SRR1186589+ADs-ILLUMINA+ADs-Paired+ADs-312+ADs-SRX483888 Human Human stool+ADs- Homo sapiens 2009 4 Africa Tanzania University of Maryland Institute for Genome Sciences Escherichia coli PRJNA233776 SRP039685 SAMN02680183 SRS568199 2015+AC0-08+AC0-27 2014+AC0-03+AC0-10 ESC+AF8-BA8539AA Assembled NaN 129394 4895199 Escherichia coli / Shigella+ADs-94.32+ACU- 175 1452 E…
2+AC0-052+AC0-05+AF8-S3+AF8-C2 SRR1191650+ADs-ILLUMINA+ADs-Paired+ADs-375+ADs-SRX488731 Human Human stool+ADs- Homo sapiens 2009 4 Africa Tanzania University of Maryland Institute for Genome Sciences Escherichia coli PRJNA233806 SRP040091 SAMN02689032 SRS572007 2015+AC0-08+AC0-27 2014+AC0-03+AC0-13 ESC+AF8-BA8357AA Assembled NaN 129394 4888528 Escherichia coli / Shigella+ADs-94.86+ACU- 166 1974 E…
2+AC0-052+AC0-05+AF8-S3+AF8-C3 SRR1186364+ADs-ILLUMINA+ADs-Paired+ADs-297+ADs-SRX483726 Human Human stool+ADs- Homo sapiens 2009 4 Africa Tanzania University of Maryland Institute for Genome Sciences Escherichia coli PRJNA233834 SRP039626 SAMN02680106 SRS568039 2015+AC0-08+AC0-27 2014+AC0-03+AC0-10 ESC+AF8-BA8594AA Assembled NaN 129394 4894551 Escherichia coli / Shigella+ADs-94.25+ACU- 170 1553 E…
2+AC0-052+AC0-05+AF8-S4+AF8-C1 SRR1186597+ADs-ILLUMINA+ADs-Paired+ADs-389+ADs-SRX483895	SRR1186596+ADs-ILLUMINA+ADs-Paired+ADs-389+ADs-SRX483896 Human Human stool+ADs- Homo sapiens 2009 7 Africa Tanzania University of Maryland Institute for Genome Sciences Escherichia coli PRJNA233859 SRP039691 SAMN02680190 SRS568206 2015+AC0-08+AC0-27 2014+AC0-03+AC0-10 ESC+AF8-BA8533AA Assembled NaN 89954 5149515 Escherichia coli / Shigella+ADs-99.33+ACU- 290 3454 ESC+AF8-CA3892AA+AF8-AS 2.2
2+AC0-052+AC0-05+AF8-S4+AF8-C2 SRR1186726+ADs-ILLUMINA+ADs-Paired+ADs-378+ADs-SRX484019 Human Human stool+ADs- Homo sapiens 2009 7 Africa Tanzania University of Maryland Institute for Genome Sciences Escherichia coli PRJNA233887 SRP039776 SAMN02687477 SRS568325 2015+AC0-08+AC0-27 2014+AC0-03+AC0-10 ESC+AF8-BA8451AA Assembled NaN 198417 5191671 Escherichia coli / Shigella+ADs-92.98+ACU- 144 974 ES…
2+AC0-052+AC0-05+AF8-S4+AF8-C3 SRR1186759+ADs-ILLUMINA+ADs-Paired+ADs-364+ADs-SRX484049 Human Human stool+ADs- Homo sapiens 2009 7 Africa Tanzania University of Maryland Institute for Genome Sciences Escherichia coli PRJNA233917 SRP039804 SAMN02687505 SRS568355 2015+AC0-08+AC0-27 2014+AC0-03+AC0-10 ESC+AF8-BA8423AA Assembled NaN 83045 4632138 Escherichia coli / Shigella+ADs-94.14+ACU- 153 1226 ES…
214 traces+AC0-0EtKNkb+ADs-ILLUMINA+ADs-Paired+ADsAOw-NA Human Africa Tanzania Mazimbu Egle Kudirkiene	University of Copenhagen Escherichia coli 2016+AC0-08+AC0-22 2017+AC0-02+AC0-24 ESC+AF8-EA4204AA Assembled 62 97284 4858620 Escherichia coli / Shigella+ADs-97.96+ACU- 195 8871 ESC+AF8-IA0265AA+AF8-AS 3.51
2+AC0-156+AC0-04+AF8-S1+AF8-C3 SRR1186799+ADs-ILLUMINA+ADs-Paired+ADs-367+ADs-SRX484088 Human Human stool+ADs- Homo sapiens 2009 1 Africa Tanzania University of Maryland Institute for Genome Sciences Escherichia coli PRJNA233752 SRP039838 SAMN02687539 SRS568394 2015+AC0-08+AC0-27 2014+AC0-03+AC0-10 ESC+AF8-BA8389AA Assembled NaN 86767 4789926 Escherichia coli / Shigella+ADs-99.44+ACU- 197 1524 ES…
2+AC0-156+AC0-04+AF8-S3+AF8-C1 SRR1186619+ADs-ILLUMINA+ADs-Paired+ADs-400+ADs-SRX483919	SRR1186618+ADs-ILLUMINA+ADs-Paired+ADs-400+ADs-SRX483918 Human Human stool+ADs- Homo sapiens 2009 4 Africa Tanzania University of Maryland Institute for Genome Sciences Escherichia coli PRJNA233777 SRP039697 SAMN02680197 SRS568227 2015+AC0-08+AC0-27 2014+AC0-03+AC0-10 ESC+AF8-BA8528AA Assembled NaN 143926 4908495 Escherichia coli / Shigella+ADs-97.85+ACU- 162 2279 ESC+AF8-FA7166AA+AF8-AS 2.2
2+AC0-156+AC0-04+AF8-S3+AF8-C2 SRR1186682+ADs-ILLUMINA+ADs-Paired+ADs-533+ADs-SRX483979 Human Human stool+ADs- Homo sapiens 2009 4 Africa Tanzania University of Maryland Institute for Genome Sciences Escherichia coli PRJNA233807 SRP039753 SAMN02680254 SRS568285 2015+AC0-08+AC0-27 2014+AC0-03+AC0-10 ESC+AF8-BA8472AA Assembled NaN 335850 4867581 Escherichia coli / Shigella+ADs-84.91+ACU- 50 1355 ES…
2+AC0-156+AC0-04+AF8-S3+AF8-C3 SRR1186774+ADs-ILLUMINA+ADs-Paired+ADs-432+ADs-SRX484064 Human Human stool+ADs- Homo sapiens 2009 4 Africa Tanzania University of Maryland Institute for Genome Sciences Escherichia coli PRJNA233835 SRP039819 SAMN02687520 SRS568370 2015+AC0-08+AC0-27 2014+AC0-03+AC0-10 ESC+AF8-BA8408AA Assembled NaN 143668 5009579 Escherichia coli / Shigella+ADs-98.49+ACU- 155 2237 E…
2+AC0-156+AC0-04+AF8-S4+AF8-C1 SRR1186616+ADs-ILLUMINA+ADs-Paired+ADs-462+ADs-SRX483915 Human Human stool+ADs- Homo sapiens 2009 7 Africa Tanzania University of Maryland Institute for Genome Sciences Escherichia coli PRJNA233860 SRP039695 SAMN02680195 SRS568225 2015+AC0-08+AC0-27 2014+AC0-03+AC0-10 ESC+AF8-BA8530AA Assembled NaN 74876 4758898 Escherichia coli / Shigella+ADs-94.43+ACU- 169 1880 ES…
2+AC0-156+AC0-04+AF8-S4+AF8-C2 SRR1186798+ADs-ILLUMINA+ADs-Paired+ADs-440+ADs-SRX484087 Human Human stool+ADs- Homo sapiens 2009 7 Africa Tanzania University of Maryland Institute for Genome Sciences Escherichia coli PRJNA233888 SRP039837 SAMN02687538 SRS568393 2015+AC0-08+AC0-27 2014+AC0-03+AC0-10 ESC+AF8-BA8390AA Assembled NaN 74853 4932012 Escherichia coli / Shigella+ADs-75.8+ACU- 251 3550 ESC…
2+AC0-156+AC0-04+AF8-S4+AF8-C3 SRR1186770+ADs-ILLUMINA+ADs-Paired+ADs-462+ADs-SRX484060 Human Human stool+ADs- Homo sapiens 2009 7 Africa Tanzania University of Maryland Institute for Genome Sciences Escherichia coli PRJNA233918 SRP039815 SAMN02687516 SRS568366 2015+AC0-08+AC0-27 2014+AC0-03+AC0-10 ESC+AF8-BA8412AA Assembled NaN 95105 4697649 Escherichia coli / Shigella+ADs-92.15+ACU- 158 1451 ES…
2+AC0-177+AC0-06+AF8-S1+AF8-C1 SRR1186520+ADs-ILLUMINA+ADs-Paired+ADs-467+ADs-SRX483881 Human Human stool+ADs- Homo sapiens 2009 1 Africa Tanzania University of Maryland Institute for Genome Sciences Escherichia coli PRJNA233697 SRP039680 SAMN02680179 SRS568192 2015+AC0-08+AC0-27 2014+AC0-03+AC0-10 ESC+AF8-BA8543AA Assembled NaN 211037 5063253 Escherichia coli / Shigella+ADs-98.44+ACU- 154 2173 E…
2+AC0-177+AC0-06+AF8-S1+AF8-C2 SRR1186718+ADs-ILLUMINA+ADs-Paired+ADs-434+ADs-SRX484013 Human Human stool+ADs- Homo sapiens 2009 1 Africa Tanzania University of Maryland Institute for Genome Sciences Escherichia coli PRJNA233725 SRP039770 SAMN02687471 SRS568319 2015+AC0-08+AC0-27 2014+AC0-03+AC0-10 ESC+AF8-BA8457AA Assembled NaN 211064 5100397 Escherichia coli / Shigella+ADs-98.58+ACU- 168 1746 E…
2+AC0-177+AC0-06+AF8-S1+AF8-C3 SRR1186670+ADs-ILLUMINA+ADs-Paired+ADs-421+ADs-SRX483967 Human Human stool+ADs- Homo sapiens 2009 1 Africa Tanzania University of Maryland Institute for Genome Sciences Escherichia coli PRJNA233753 SRP039741 SAMN02680242 SRS568273 2015+AC0-08+AC0-27 2014+AC0-03+AC0-10 ESC+AF8-BA8484AA Assembled NaN 211064 5097291 Escherichia coli / Shigella+ADs-98.55+ACU- 165 2076 E…
2+AC0-177+AC0-06+AF8-S3+AF8-C1 SRR1186744+ADs-ILLUMINA+ADs-Paired+ADs-489+ADs-SRX484036 Human Human stool+ADs- Homo sapiens 2009 4 Africa Tanzania University of Maryland Institute for Genome Sciences Escherichia coli PRJNA233778 SRP039793 SAMN02687494 SRS568342 2015+AC0-08+AC0-27 2014+AC0-03+AC0-10 ESC+AF8-BA8434AA Assembled NaN 136401 4990200 Escherichia coli / Shigella+ADs-98.78+ACU- 180 3201 E…
2+AC0-177+AC0-06+AF8-S3+AF8-C2 SRR1186462+ADs-ILLUMINA+ADs-Paired+ADs-468+ADs-SRX483824 Human Human stool+ADs- Homo sapiens 2009 4 Africa Tanzania University of Maryland Institute for Genome Sciences Escherichia coli PRJNA233808 SRP039644 SAMN02680141 SRS568137 2015+AC0-08+AC0-27 2014+AC0-03+AC0-10 ESC+AF8-BA8578AA Assembled NaN 133240 5117492 Escherichia coli / Shigella+ADs-97.04+ACU- 178 2532 E…
2+AC0-177+AC0-06+AF8-S3+AF8-C3 SRR1191651+ADs-ILLUMINA+ADs-Paired+ADs-485+ADs-SRX488732 Human Human stool+ADs- Homo sapiens 2009 4 Africa Tanzania University of Maryland Institute for Genome Sciences Escherichia coli PRJNA233836 SRP040092 SAMN02689033 SRS572008 2015+AC0-08+AC0-27 2014+AC0-03+AC0-13 ESC+AF8-BA8356AA Assembled NaN 133240 5029410 Escherichia coli / Shigella+ADs-96.39+ACU- 169 2370 E…
2+AC0-177+AC0-06+AF8-S4+AF8-C1 SRR1186751+ADs-ILLUMINA+ADs-Paired+ADs-462+ADs-SRX484041 Human Human stool+ADs- Homo sapiens 2009 7 Africa Tanzania University of Maryland Institute for Genome Sciences Escherichia coli PRJNA233861 SRP039797 SAMN02687498 SRS568347 2015+AC0-08+AC0-27 2014+AC0-03+AC0-10 ESC+AF8-BA8430AA Assembled NaN 253619 5017229 Escherichia coli / Shigella+ADs-97.9+ACU- 104 834 ESC…
2+AC0-177+AC0-06+AF8-S4+AF8-C2 SRR1186398+ADs-ILLUMINA+ADs-Paired+ADs-458+ADs-SRX483764 Human Human stool+ADs- Homo sapiens 2009 7 Africa Tanzania University of Maryland Institute for Genome Sciences Escherichia coli PRJNA233889 SRP039636 SAMN02680135 SRS568078 2015+AC0-08+AC0-27 2014+AC0-03+AC0-10 ESC+AF8-BA8584AA Assembled NaN 112203 4813789 Escherichia coli / Shigella+ADs-95.78+ACU- 141 1052 E…
2+AC0-177+AC0-06+AF8-S4+AF8-C3 SRR1186760+ADs-ILLUMINA+ADs-Paired+ADs-444+ADs-SRX484050 Human Human stool+ADs- Homo sapiens 2009 7 Africa Tanzania University of Maryland Institute for Genome Sciences Escherichia coli PRJNA233919 SRP039805 SAMN02687506 SRS568356 2015+AC0-08+AC0-27 2014+AC0-03+AC0-10 ESC+AF8-BA8422AA Assembled NaN 138711 5370382 Escherichia coli / Shigella+ADs-99.48+ACU- 230 2024 E…
2+AC0-210+AC0-07+AF8-S1+AF8-C2 SRR1186620+ADs-ILLUMINA+ADs-Paired+ADs-501+ADs-SRX483920 Human Human stool+ADs- Homo sapiens 2009 1 Africa Tanzania University of Maryland Institute for Genome Sciences Escherichia coli PRJNA233726 SRP039698 SAMN02680198 SRS568228 2015+AC0-08+AC0-27 2014+AC0-03+AC0-10 ESC+AF8-BA8527AA Assembled NaN 134238 4914412 Escherichia coli / Shigella+ADs-79.09+ACU- 153 2205 E…
2+AC0-210+AC0-07+AF8-S1+AF8-C3 SRR1186461+ADs-ILLUMINA+ADs-Paired+ADs-480+ADs-SRX483823 Human Human stool+ADs- Homo sapiens 2009 1 Africa Tanzania University of Maryland Institute for Genome Sciences Escherichia coli PRJNA233754 SRP039643 SAMN02680140 SRS568136 2015+AC0-08+AC0-27 2014+AC0-03+AC0-10 ESC+AF8-BA8579AA Assembled NaN 134143 4964212 Escherichia coli / Shigella+ADs-75.36+ACU- 154 1833 E…
2+AC0-210+AC0-07+AF8-S3+AF8-C1 SRR1186800+ADs-ILLUMINA+ADs-Paired+ADs-481+ADs-SRX484089 Human Human stool+ADs- Homo sapiens 2009 4 Africa Tanzania University of Maryland Institute for Genome Sciences Escherichia coli PRJNA233779 SRP039839 SAMN02687540 SRS568395 2015+AC0-08+AC0-27 2014+AC0-03+AC0-10 ESC+AF8-BA8388AA Assembled NaN 147618 4548963 Escherichia coli / Shigella+ADs-98.61+ACU- 91 875 ESC…
2+AC0-210+AC0-07+AF8-S3+AF8-C2 SRR1186391+ADs-ILLUMINA+ADs-Paired+ADs-468+ADs-SRX483757 Human Human stool+ADs- Homo sapiens 2009 4 Africa Tanzania University of Maryland Institute for Genome Sciences Escherichia coli PRJNA233809 SRP039631 SAMN02680129 SRS568061 2015+AC0-08+AC0-27 2014+AC0-03+AC0-10 ESC+AF8-BA8589AA Assembled NaN 82807 4970479 Escherichia coli / Shigella+ADs-97.07+ACU- 229 1329 ES…
2+AC0-210+AC0-07+AF8-S3+AF8-C3 SRR1186739+ADs-ILLUMINA+ADs-Paired+ADs-512+ADs-SRX484031 Human Human stool+ADs- Homo sapiens 2009 4 Africa Tanzania University of Maryland Institute for Genome Sciences Escherichia coli PRJNA233837 SRP039788 SAMN02687489 SRS568337 2015+AC0-08+AC0-27 2014+AC0-03+AC0-10 ESC+AF8-BA8439AA Assembled NaN 72261 5125631 Escherichia coli / Shigella+ADs-98.34+ACU- 395 4214 ES…
2+AC0-210+AC0-07+AF8-S4+AF8-C1 SRR1186782+ADs-ILLUMINA+ADs-Paired+ADs-447+ADs-SRX484072 Human Human stool+ADs- Homo sapiens 2009 7 Africa Tanzania University of Maryland Institute for Genome Sciences Escherichia coli PRJNA233862 SRP039827 SAMN02687528 SRS568378 2015+AC0-08+AC0-27 2014+AC0-03+AC0-10 ESC+AF8-BA8400AA Assembled NaN 206857 4824331 Escherichia coli / Shigella+ADs-97.54+ACU- 99 941 ESC…
2+AC0-210+AC0-07+AF8-S4+AF8-C2 SRR1186680+ADs-ILLUMINA+ADs-Paired+ADs-467+ADs-SRX483977 Human Human stool+ADs- Homo sapiens 2009 7 Africa Tanzania University of Maryland Institute for Genome Sciences Escherichia coli PRJNA233890 SRP039751 SAMN02680252 SRS568283 2015+AC0-08+AC0-27 2014+AC0-03+AC0-10 ESC+AF8-BA8474AA Assembled NaN 95435 4701562 Escherichia coli / Shigella+ADs-91.65+ACU- 157 2321 ES…
2+AC0-210+AC0-07+AF8-S4+AF8-C3 SRR1186400+ADs-ILLUMINA+ADs-Paired+ADs-474+ADs-SRX483765 Human Human stool+ADs- Homo sapiens 2009 7 Africa Tanzania University of Maryland Institute for Genome Sciences Escherichia coli PRJNA233920 SRP039637 SAMN02680136 SRS568079 2015+AC0-08+AC0-27 2014+AC0-03+AC0-10 ESC+AF8-BA8583AA Assembled NaN 95526 4701321 Escherichia coli / Shigella+ADs-91.1+ACU- 158 3373 ESC…
2+AC0-222+AC0-05+AF8-S1+AF8-C1 SRR1186477+ADs-ILLUMINA+ADs-Paired+ADs-521+ADs-SRX483838 Human Human stool+ADs- Homo sapiens 2009 1 Africa Tanzania University of Maryland Institute for Genome Sciences Escherichia coli PRJNA233698 SRP039657 SAMN02680155 SRS568151 2015+AC0-08+AC0-27 2014+AC0-03+AC0-10 ESC+AF8-BA8565AA Assembled NaN 236203 4750037 Escherichia coli / Shigella+ADs-100.0+ACU- 86 766 ESC…
2+AC0-222+AC0-05+AF8-S1+AF8-C2 SRR1186640+ADs-ILLUMINA+ADs-Paired+ADs-529+ADs-SRX483939 Human Human stool+ADs- Homo sapiens 2009 1 Africa Tanzania University of Maryland Institute for Genome Sciences Escherichia coli PRJNA233727 SRP039715 SAMN02680216 SRS568246 2015+AC0-08+AC0-27 2014+AC0-03+AC0-10 ESC+AF8-BA8510AA Assembled NaN 221692 4840147 Escherichia coli / Shigella+ADs-98.95+ACU- 105 888 ES…
2+AC0-222+AC0-05+AF8-S1+AF8-C3 SRR1186719+ADs-ILLUMINA+ADs-Paired+ADs-563+ADs-SRX484014 Human Human stool+ADs- Homo sapiens 2009 1 Africa Tanzania University of Maryland Institute for Genome Sciences Escherichia coli PRJNA233755 SRP039771 SAMN02687472 SRS568320 2015+AC0-08+AC0-27 2014+AC0-03+AC0-10 ESC+AF8-BA8456AA Assembled NaN 230505 4836075 Escherichia coli / Shigella+ADs-100.0+ACU- 102 1141 E…
2+AC0-222+AC0-05+AF8-S3+AF8-C1 SRR1191652+ADs-ILLUMINA+ADs-Paired+ADs-527+ADs-SRX488733 Human Human stool+ADs- Homo sapiens 2009 4 Africa Tanzania University of Maryland Institute for Genome Sciences Escherichia coli PRJNA233780 SRP040093 SAMN02689034 SRS572010 2015+AC0-08+AC0-27 2014+AC0-03+AC0-13 ESC+AF8-BA8355AA Assembled NaN 105119 5220749 Escherichia coli / Shigella+ADs-98.54+ACU- 224 2484 E…
2+AC0-222+AC0-05+AF8-S3+AF8-C2 SRR1191654+ADs-ILLUMINA+ADs-Paired+ADs-762+ADs-SRX488735	SRR1191653+ADs-ILLUMINA+ADs-Paired+ADs-762+ADs-SRX488734 Human Human stool+ADs- Homo sapiens 2009 4 Africa Tanzania University of Maryland Institute for Genome Sciences Escherichia coli PRJNA233810 SRP040094 SAMN02689035 SRS572012 2015+AC0-08+AC0-27 2014+AC0-03+AC0-13 ESC+AF8-BA8354AA Assembled NaN 105120 5221829 Escherichia coli / Shigella+ADs-99.47+ACU- 195 3619 ESC+AF8-CA5793AA+AF8-AS 2.2
2+AC0-222+AC0-05+AF8-S3+AF8-C3 SRR1186354+ADs-ILLUMINA+ADs-Paired+ADs-519+ADs-SRX483716 Human Human stool+ADs- Homo sapiens 2009 4 Africa Tanzania University of Maryland Institute for Genome Sciences Escherichia coli PRJNA233838 SRP039622 SAMN02680102 SRS568029 2015+AC0-08+AC0-27 2014+AC0-03+AC0-10 ESC+AF8-BA8598AA Assembled NaN 100711 5228071 Escherichia coli / Shigella+ADs-99.05+ACU- 230 2933 E…
2+AC0-222+AC0-05+AF8-S4+AF8-C1 SRR1186678+ADs-ILLUMINA+ADs-Paired+ADs-445+ADs-SRX483975 Human Human stool+ADs- Homo sapiens 2009 7 Africa Tanzania University of Maryland Institute for Genome Sciences Escherichia coli PRJNA233863 SRP039749 SAMN02680250 SRS568281 2015+AC0-08+AC0-27 2014+AC0-03+AC0-10 ESC+AF8-BA8476AA Assembled NaN 95594 4710512 Escherichia coli / Shigella+ADs-90.92+ACU- 160 1354 ES…
2+AC0-222+AC0-05+AF8-S4+AF8-C3 SRR1191655+ADs-ILLUMINA+ADs-Paired+ADs-567+ADs-SRX488736 Human Human stool+ADs- Homo sapiens 2009 7 Africa Tanzania University of Maryland Institute for Genome Sciences Escherichia coli PRJNA233921 SRP040095 SAMN02689036 SRS572028 2015+AC0-08+AC0-27 2014+AC0-03+AC0-13 ESC+AF8-BA8353AA Assembled NaN 109114 5001455 Escherichia coli / Shigella+ADs-96.19+ACU- 201 2904 E…
2+AC0-316+AC0-03+AF8-S1+AF8-C1 SRR1191656+ADs-ILLUMINA+ADs-Paired+ADs-572+ADs-SRX488737 Human Human stool+ADs- Homo sapiens 2009 1 Africa Tanzania University of Maryland Institute for Genome Sciences Escherichia coli PRJNA233699 SRP040096 SAMN02689037 SRS572029 2015+AC0-08+AC0-27 2014+AC0-03+AC0-13 ESC+AF8-BA8352AA Assembled NaN 167914 5178917 Escherichia coli / Shigella+ADs-98.7+ACU- 172 1789 ES…
2+AC0-316+AC0-03+AF8-S1+AF8-C2 SRR1191657+ADs-ILLUMINA+ADs-Paired+ADs-545+ADs-SRX488738 Human Human stool+ADs- Homo sapiens 2009 1 Africa Tanzania University of Maryland Institute for Genome Sciences Escherichia coli PRJNA233728 SRP040097 SAMN02689038 SRS572032 2015+AC0-08+AC0-27 2014+AC0-03+AC0-13 ESC+AF8-BA8351AA Assembled NaN 168145 5180005 Escherichia coli / Shigella+ADs-98.75+ACU- 177 1957 E…
2+AC0-316+AC0-03+AF8-S3+AF8-C1 SRR1186671+ADs-ILLUMINA+ADs-Paired+ADs-498+ADs-SRX483968 Human Human stool+ADs- Homo sapiens 2009 4 Africa Tanzania University of Maryland Institute for Genome Sciences Escherichia coli PRJNA233781 SRP039742 SAMN02680243 SRS568274 2015+AC0-08+AC0-27 2014+AC0-03+AC0-10 ESC+AF8-BA8483AA Assembled NaN 140995 4904401 Escherichia coli / Shigella+ADs-86.23+ACU- 145 1229 E…
2+AC0-316+AC0-03+AF8-S3+AF8-C2 SRR1186479+ADs-ILLUMINA+ADs-Paired+ADs-530+ADs-SRX483840 Human Human stool+ADs- Homo sapiens 2009 4 Africa Tanzania University of Maryland Institute for Genome Sciences Escherichia coli PRJNA233811 SRP039658 SAMN02680157 SRS568153 2015+AC0-08+AC0-27 2014+AC0-03+AC0-10 ESC+AF8-BA8564AA Assembled NaN 193375 4706114 Escherichia coli / Shigella+ADs-98.57+ACU- 91 781 ESC…
2+AC0-316+AC0-03+AF8-S3+AF8-C3 SRR1186668+ADs-ILLUMINA+ADs-Paired+ADs-537+ADs-SRX483965 Human Human stool+ADs- Homo sapiens 2009 4 Africa Tanzania University of Maryland Institute for Genome Sciences Escherichia coli PRJNA233839 SRP039739 SAMN02680240 SRS568271 2015+AC0-08+AC0-27 2014+AC0-03+AC0-10 ESC+AF8-BA8486AA Assembled NaN 193375 4705973 Escherichia coli / Shigella+ADs-98.57+ACU- 89 856 ESC…
2+AC0-316+AC0-03+AF8-S4+AF8-C1 SRR1186740+ADs-ILLUMINA+ADs-Paired+ADs-500+ADs-SRX484032 Human Human stool+ADs- Homo sapiens 2009 7 Africa Tanzania University of Maryland Institute for Genome Sciences Escherichia coli PRJNA233864 SRP039789 SAMN02687490 SRS568338 2015+AC0-08+AC0-27 2014+AC0-03+AC0-10 ESC+AF8-BA8438AA Assembled NaN 198371 4988393 Escherichia coli / Shigella+ADs-96.99+ACU- 147 2556 E…
2+AC0-316+AC0-03+AF8-S4+AF8-C2 SRR1186598+ADs-ILLUMINA+ADs-Paired+ADs-559+ADs-SRX483897 Human Human stool+ADs- Homo sapiens 2009 7 Africa Tanzania University of Maryland Institute for Genome Sciences Escherichia coli PRJNA233892 SRP039692 SAMN02680191 SRS568207 2015+AC0-08+AC0-27 2014+AC0-03+AC0-10 ESC+AF8-BA8532AA Assembled NaN 110137 5103699 Escherichia coli / Shigella+ADs-99.37+ACU- 189 1970 E…
2+AC0-316+AC0-03+AF8-S4+AF8-C3 SRR1186472+ADs-ILLUMINA+ADs-Paired+ADs-533+ADs-SRX483833 Human Human stool+ADs- Homo sapiens 2009 7 Africa Tanzania University of Maryland Institute for Genome Sciences Escherichia coli PRJNA233922 SRP039652 SAMN02680150 SRS568146 2015+AC0-08+AC0-27 2014+AC0-03+AC0-10 ESC+AF8-BA8570AA Assembled NaN 161776 5330938 Escherichia coli / Shigella+ADs-97.58+ACU- 141 1531 E…
2+AC0-427+AC0-07+AF8-S1+AF8-C1 SRR1186649+ADs-ILLUMINA+ADs-Paired+ADs-580+ADs-SRX483948 Human Human stool+ADs- Homo sapiens 2009 1 Africa Tanzania University of Maryland Institute for Genome Sciences Escherichia coli PRJNA233700 SRP039724 SAMN02680225 SRS568255 2015+AC0-08+AC0-27 2014+AC0-03+AC0-10 ESC+AF8-BA8501AA Assembled NaN 277940 4558355 Escherichia coli / Shigella+ADs-94.23+ACU- 58 540 ESC…
2+AC0-427+AC0-07+AF8-S1+AF8-C2 SRR1186487+ADs-ILLUMINA+ADs-Paired+ADs-570+ADs-SRX483848 Human Human stool+ADs- Homo sapiens 2009 1 Africa Tanzania University of Maryland Institute for Genome Sciences Escherichia coli PRJNA233729 SRP039665 SAMN02680164 SRS568160 2015+AC0-08+AC0-27 2014+AC0-03+AC0-10 ESC+AF8-BA8557AA Assembled NaN 278053 4664205 Escherichia coli / Shigella+ADs-92.64+ACU- 80 658 ESC…
2+AC0-427+AC0-07+AF8-S1+AF8-C3 SRR1186518+ADs-ILLUMINA+ADs-Paired+ADs-565+ADs-SRX483879 Human Human stool+ADs- Homo sapiens 2009 1 Africa Tanzania University of Maryland Institute for Genome Sciences Escherichia coli PRJNA233756 SRP039678 SAMN02680177 SRS568190 2015+AC0-08+AC0-27 2014+AC0-03+AC0-10 ESC+AF8-BA8545AA Assembled NaN 171774 4953632 Escherichia coli / Shigella+ADs-92.31+ACU- 141 2030 E…
2+AC0-427+AC0-07+AF8-S3+AF8-C1 SRR1186484+ADs-ILLUMINA+ADs-Paired+ADs-519+ADs-SRX483845 Human Human stool+ADs- Homo sapiens 2009 4 Africa Tanzania University of Maryland Institute for Genome Sciences Escherichia coli PRJNA233782 SRP039662 SAMN02680161 SRS568157 2015+AC0-08+AC0-27 2014+AC0-03+AC0-10 ESC+AF8-BA8560AA Assembled NaN 288287 4771447 Escherichia coli / Shigella+ADs-98.08+ACU- 69 321 ESC…
2+AC0-427+AC0-07+AF8-S3+AF8-C3 SRR1186489+ADs-ILLUMINA+ADs-Paired+ADs-554+ADs-SRX483850 Human Human stool+ADs- Homo sapiens 2009 4 Africa Tanzania University of Maryland Institute for Genome Sciences Escherichia coli PRJNA233840 SRP039667 SAMN02680166 SRS568162 2015+AC0-08+AC0-27 2014+AC0-03+AC0-10 ESC+AF8-BA8555AA Assembled NaN 288400 4772884 Escherichia coli / Shigella+ADs-98.18+ACU- 68 850 ESC…
2+AC0-427+AC0-07+AF8-S4+AF8-C1 SRR1186741+ADs-ILLUMINA+ADs-Paired+ADs-529+ADs-SRX484033 Human Human stool+ADs- Homo sapiens 2009 7 Africa Tanzania University of Maryland Institute for Genome Sciences Escherichia coli PRJNA233865 SRP039790 SAMN02687491 SRS568339 2015+AC0-08+AC0-27 2014+AC0-03+AC0-10 ESC+AF8-BA8437AA Assembled NaN 97870 4988489 Escherichia coli / Shigella+ADs-98.35+ACU- 201 2563 ES…
2+AC0-427+AC0-07+AF8-S4+AF8-C2 SRR1186467+ADs-ILLUMINA+ADs-Paired+ADs-532+ADs-SRX483828 Human Human stool+ADs- Homo sapiens 2009 7 Africa Tanzania University of Maryland Institute for Genome Sciences Escherichia coli PRJNA233893 SRP039647 SAMN02680145 SRS568141 2015+AC0-08+AC0-27 2014+AC0-03+AC0-10 ESC+AF8-BA8575AA Assembled NaN 216137 5354655 Escherichia coli / Shigella+ADs-99.11+ACU- 118 1525 E…
2+AC0-427+AC0-07+AF8-S4+AF8-C3 SRR1191658+ADs-ILLUMINA+ADs-Paired+ADs-579+ADs-SRX488739 Human Human stool+ADs- Homo sapiens 2009 7 Africa Tanzania University of Maryland Institute for Genome Sciences Escherichia coli PRJNA233923 SRP040098 SAMN02689039 SRS572033 2015+AC0-08+AC0-27 2014+AC0-03+AC0-13 ESC+AF8-BA8350AA Assembled NaN 127642 5436050 Escherichia coli / Shigella+ADs-99.61+ACU- 288 2247 E…
2+AC0-460+AC0-02+AF8-S1+AF8-C1 SRR1191659+ADs-ILLUMINA+ADs-Paired+ADs-551+ADs-SRX488740 Human Human stool+ADs- Homo sapiens 2009 1 Africa Tanzania University of Maryland Institute for Genome Sciences Escherichia coli PRJNA233701 SRP040099 SAMN02689040 SRS572036 2015+AC0-08+AC0-27 2014+AC0-03+AC0-13 ESC+AF8-BA8349AA Assembled NaN 131073 5401296 Escherichia coli / Shigella+ADs-99.57+ACU- 254 1960 E…
2+AC0-460+AC0-02+AF8-S1+AF8-C2 SRR1191660+ADs-ILLUMINA+ADs-Paired+ADs-578+ADs-SRX488741 Human Human stool+ADs- Homo sapiens 2009 1 Africa Tanzania University of Maryland Institute for Genome Sciences Escherichia coli PRJNA233730 SRP040100 SAMN02689041 SRS572037 2015+AC0-08+AC0-27 2014+AC0-03+AC0-13 ESC+AF8-BA8348AA Assembled NaN 216137 5356430 Escherichia coli / Shigella+ADs-99.15+ACU- 125 1809 E…
2+AC0-460+AC0-02+AF8-S1+AF8-C3 SRR1191661+ADs-ILLUMINA+ADs-Paired+ADs-513+ADs-SRX488742 Human Human stool+ADs- Homo sapiens 2009 1 Africa Tanzania University of Maryland Institute for Genome Sciences Escherichia coli PRJNA233757 SRP040101 SAMN02689042 SRS572038 2015+AC0-08+AC0-27 2014+AC0-03+AC0-13 ESC+AF8-BA8347AA Assembled NaN 216137 5354500 Escherichia coli / Shigella+ADs-99.19+ACU- 136 1394 E…
2+AC0-460+AC0-02+AF8-S3+AF8-C1 SRR1186675+ADs-ILLUMINA+ADs-Paired+ADs-525+ADs-SRX483972 Human Human stool+ADs- Homo sapiens 2009 4 Africa Tanzania University of Maryland Institute for Genome Sciences Escherichia coli PRJNA233783 SRP039746 SAMN02680247 SRS568278 2015+AC0-08+AC0-27 2014+AC0-03+AC0-10 ESC+AF8-BA8479AA Assembled NaN 62417 5187559 Escherichia coli / Shigella+ADs-97.33+ACU- 288 2322 ES…
2+AC0-460+AC0-02+AF8-S3+AF8-C2 SRR1186657+ADs-ILLUMINA+ADs-Paired+ADs-566+ADs-SRX483956 Human Human stool+ADs- Homo sapiens 2009 4 Africa Tanzania University of Maryland Institute for Genome Sciences Escherichia coli PRJNA233812 SRP039730 SAMN02680231 SRS568261 2015+AC0-08+AC0-27 2014+AC0-03+AC0-10 ESC+AF8-BA8495AA Assembled NaN 62484 5204093 Escherichia coli / Shigella+ADs-96.17+ACU- 282 2391 ES…
2+AC0-460+AC0-02+AF8-S3+AF8-C3 SRR1186397+ADs-ILLUMINA+ADs-Paired+ADs-524+ADs-SRX483763 Human Human stool+ADs- Homo sapiens 2009 4 Africa Tanzania University of Maryland Institute for Genome Sciences Escherichia coli PRJNA233841 SRP039635 SAMN02680134 SRS568077 2015+AC0-08+AC0-27 2014+AC0-03+AC0-10 ESC+AF8-BA8585AA Assembled NaN 62484 5067199 Escherichia coli / Shigella+ADs-95.87+ACU- 253 2669 ES…
2+AC0-460+AC0-02+AF8-S4+AF8-C1 SRR1191662+ADs-ILLUMINA+ADs-Paired+ADs-419+ADs-SRX488743 Human Human stool+ADs- Homo sapiens 2009 7 Africa Tanzania University of Maryland Institute for Genome Sciences Escherichia coli PRJNA233866 SRP040102 SAMN02689043 SRS572039 2015+AC0-08+AC0-27 2014+AC0-03+AC0-13 ESC+AF8-BA8346AA Assembled NaN 149295 5179731 Escherichia coli / Shigella+ADs-98.98+ACU- 225 1796 E…
2+AC0-460+AC0-02+AF8-S4+AF8-C2 SRR1186775+ADs-ILLUMINA+ADs-Paired+ADs-436+ADs-SRX484065 Human Human stool+ADs- Homo sapiens 2009 7 Africa Tanzania University of Maryland Institute for Genome Sciences Escherichia coli PRJNA233894 SRP039820 SAMN02687521 SRS568371 2015+AC0-08+AC0-27 2014+AC0-03+AC0-10 ESC+AF8-BA8407AA Assembled NaN 149295 5181436 Escherichia coli / Shigella+ADs-98.98+ACU- 227 1915 E…
2+AC0-460+AC0-02+AF8-S4+AF8-C3 SRR1186796+ADs-ILLUMINA+ADs-Paired+ADs-423+ADs-SRX484085 Human Human stool+ADs- Homo sapiens 2009 7 Africa Tanzania University of Maryland Institute for Genome Sciences Escherichia coli PRJNA233924 SRP039835 SAMN02687536 SRS568391 2015+AC0-08+AC0-27 2014+AC0-03+AC0-10 ESC+AF8-BA8392AA Assembled NaN 149296 5178190 Escherichia coli / Shigella+ADs-99.0+ACU- 221 1881 ES…
2+AC0-474+AC0-04+AF8-S1+AF8-C1 SRR1186664+ADs-ILLUMINA+ADs-Paired+ADs-525+ADs-SRX483962 Human Human stool+ADs- Homo sapiens 2009 1 Africa Tanzania University of Maryland Institute for Genome Sciences Escherichia coli PRJNA233702 SRP039736 SAMN02680237 SRS568268 2015+AC0-08+AC0-27 2014+AC0-03+AC0-10 ESC+AF8-BA8489AA Assembled NaN 147618 4906758 Escherichia coli / Shigella+ADs-88.28+ACU- 147 1306 E…
2+AC0-474+AC0-04+AF8-S1+AF8-C2 SRR1186498+ADs-ILLUMINA+ADs-Paired+ADs-504+ADs-SRX483859 Human Human stool+ADs- Homo sapiens 2009 1 Africa Tanzania University of Maryland Institute for Genome Sciences Escherichia coli PRJNA233731 SRP039674 SAMN02680174 SRS568170 2015+AC0-08+AC0-27 2014+AC0-03+AC0-10 ESC+AF8-BA8548AA Assembled NaN 209011 4745292 Escherichia coli / Shigella+ADs-88.42+ACU- 121 1636 E…
2+AC0-474+AC0-04+AF8-S3+AF8-C1 SRR1186677+ADs-ILLUMINA+ADs-Paired+ADs-565+ADs-SRX483974 Human Human stool+ADs- Homo sapiens 2009 4 Africa Tanzania University of Maryland Institute for Genome Sciences Escherichia coli PRJNA233784 SRP039748 SAMN02680249 SRS568280 2015+AC0-08+AC0-27 2014+AC0-03+AC0-10 ESC+AF8-BA8477AA Assembled NaN 88354 5120139 Escherichia coli / Shigella+ADs-96.63+ACU- 275 4743 ES…
2+AC0-474+AC0-04+AF8-S3+AF8-C2 SRR1186762+ADs-ILLUMINA+ADs-Paired+ADs-484+ADs-SRX484052 Human Human stool+ADs- Homo sapiens 2009 4 Africa Tanzania University of Maryland Institute for Genome Sciences Escherichia coli PRJNA233813 SRP039807 SAMN02687508 SRS568358 2015+AC0-08+AC0-27 2014+AC0-03+AC0-10 ESC+AF8-BA8420AA Assembled NaN 88354 5085159 Escherichia coli / Shigella+ADs-95.67+ACU- 322 4462 ES…
2+AC0-474+AC0-04+AF8-S3+AF8-C3 SRR1186781+ADs-ILLUMINA+ADs-Paired+ADs-538+ADs-SRX484071 Human Human stool+ADs- Homo sapiens 2009 4 Africa Tanzania University of Maryland Institute for Genome Sciences Escherichia coli PRJNA233842 SRP039826 SAMN02687527 SRS568377 2015+AC0-08+AC0-27 2014+AC0-03+AC0-10 ESC+AF8-BA8401AA Assembled NaN 82711 5119122 Escherichia coli / Shigella+ADs-95.16+ACU- 300 4189 ES…
2+AC0-474+AC0-04+AF8-S4+AF8-C1 SRR1186394+ADs-ILLUMINA+ADs-Paired+ADs-430+ADs-SRX483761	SRR1186395+ADs-ILLUMINA+ADs-Paired+ADs-430+ADs-SRX483760 Human Human stool+ADs- Homo sapiens 2009 7 Africa Tanzania University of Maryland Institute for Genome Sciences Escherichia coli PRJNA233867 SRP039633 SAMN02680132 SRS568075 2015+AC0-08+AC0-27 2014+AC0-03+AC0-10 ESC+AF8-BA8587AA Assembled NaN 154622 4900047 Escherichia coli / Shigella+ADs-97.67+ACU- 100 1334 ESC+AF8-BA2885AA+AF8-AS 2.2
2+AC0-474+AC0-04+AF8-S4+AF8-C2 SRR1186765+ADs-ILLUMINA+ADs-Paired+ADs-452+ADs-SRX484055 Human Human stool+ADs- Homo sapiens 2009 7 Africa Tanzania University of Maryland Institute for Genome Sciences Escherichia coli PRJNA233895 SRP039810 SAMN02687511 SRS568361 2015+AC0-08+AC0-27 2014+AC0-03+AC0-10 ESC+AF8-BA8417AA Assembled NaN 154622 4898605 Escherichia coli / Shigella+ADs-96.75+ACU- 107 1007 E…
2+AC0-474+AC0-04+AF8-S4+AF8-C3 SRR1186777+ADs-ILLUMINA+ADs-Paired+ADs-445+ADs-SRX484067 Human Human stool+ADs- Homo sapiens 2009 7 Africa Tanzania University of Maryland Institute for Genome Sciences Escherichia coli PRJNA233925 SRP039822 SAMN02687523 SRS568373 2015+AC0-08+AC0-27 2014+AC0-03+AC0-10 ESC+AF8-BA8405AA Assembled NaN 154622 4899815 Escherichia coli / Shigella+ADs-97.68+ACU- 108 1208 E…
3+AC0-020+AC0-07+AF8-S1+AF8-C1 SRR1186460+ADs-ILLUMINA+ADs-Paired+ADs-576+ADs-SRX483822 Human Human stool+ADs- Homo sapiens 2009 1 Africa Tanzania University of Maryland Institute for Genome Sciences Escherichia coli PRJNA233711 SRP039642 SAMN02680139 SRS568135 2015+AC0-08+AC0-27 2014+AC0-03+AC0-10 ESC+AF8-BA8580AA Assembled NaN 201994 4905172 Escherichia coli / Shigella+ADs-98.51+ACU- 144 1991 E…
3+AC0-020+AC0-07+AF8-S1+AF8-C2 SRR1186591+ADs-ILLUMINA+ADs-Paired+ADs-504+ADs-SRX483890 Human Human stool+ADs- Homo sapiens 2009 1 Africa Tanzania University of Maryland Institute for Genome Sciences Escherichia coli PRJNA233739 SRP039686 SAMN02680185 SRS568201 2015+AC0-08+AC0-27 2014+AC0-03+AC0-10 ESC+AF8-BA8538AA Assembled NaN 201996 4892214 Escherichia coli / Shigella+ADs-98.54+ACU- 146 1500 E…
3+AC0-020+AC0-07+AF8-S1+AF8-C3 SRR1186795+ADs-ILLUMINA+ADs-Paired+ADs-529+ADs-SRX484084 Human Human stool+ADs- Homo sapiens 2009 1 Africa Tanzania University of Maryland Institute for Genome Sciences Escherichia coli PRJNA233765 SRP039834 SAMN02687535 SRS568390 2015+AC0-08+AC0-27 2014+AC0-03+AC0-10 ESC+AF8-BA8393AA Assembled NaN 201755 4904711 Escherichia coli / Shigella+ADs-98.48+ACU- 141 1491 E…
3+AC0-020+AC0-07+AF8-S3+AF8-C1 SRR1186372+ADs-ILLUMINA+ADs-Paired+ADs-506+ADs-SRX483734 Human Human stool+ADs- Homo sapiens 2009 4 Africa Tanzania University of Maryland Institute for Genome Sciences Escherichia coli PRJNA233794 SRP039627 SAMN02680107 SRS568049 2015+AC0-08+AC0-27 2014+AC0-03+AC0-10 ESC+AF8-BA8592AA Assembled NaN 149281 5201620 Escherichia coli / Shigella+ADs-98.94+ACU- 208 2254 E…
3+AC0-020+AC0-07+AF8-S3+AF8-C2 SRR1191663+ADs-ILLUMINA+ADs-Paired+ADs-795+ADs-SRX488744 Human Human stool+ADs- Homo sapiens 2009 4 Africa Tanzania University of Maryland Institute for Genome Sciences Escherichia coli PRJNA233822 SRP040103 SAMN02689044 SRS572096 2015+AC0-08+AC0-27 2014+AC0-03+AC0-13 ESC+AF8-BA8345AA Assembled NaN 152080 5214367 Escherichia coli / Shigella+ADs-98.45+ACU- 193 4000 E…
3+AC0-020+AC0-07+AF8-S4+AF8-C1 SRR1191664+ADs-ILLUMINA+ADs-Paired+ADs-471+ADs-SRX488745 Human Human stool+ADs- Homo sapiens 2009 7 Africa Tanzania University of Maryland Institute for Genome Sciences Escherichia coli PRJNA233877 SRP040104 SAMN02689045 SRS572099 2015+AC0-08+AC0-27 2014+AC0-03+AC0-13 ESC+AF8-BA8344AA Assembled NaN 142199 5316493 Escherichia coli / Shigella+ADs-99.32+ACU- 163 1599 E…
3+AC0-020+AC0-07+AF8-S4+AF8-C2 SRR1186641+ADs-ILLUMINA+ADs-Paired+ADs-540+ADs-SRX483940 Human Human stool+ADs- Homo sapiens 2009 7 Africa Tanzania University of Maryland Institute for Genome Sciences Escherichia coli PRJNA233905 SRP039716 SAMN02680217 SRS568247 2015+AC0-08+AC0-27 2014+AC0-03+AC0-10 ESC+AF8-BA8509AA Assembled NaN 154104 5087137 Escherichia coli / Shigella+ADs-98.67+ACU- 184 1658 E…
3+AC0-020+AC0-07+AF8-S4+AF8-C3 SRR1186627+ADs-ILLUMINA+ADs-Paired+ADs-514+ADs-SRX483927 Human Human stool+ADs- Homo sapiens 2009 7 Africa Tanzania University of Maryland Institute for Genome Sciences Escherichia coli PRJNA233933 SRP039704 SAMN02680205 SRS568235 2015+AC0-08+AC0-27 2014+AC0-03+AC0-10 ESC+AF8-BA8521AA Assembled NaN 160917 5087188 Escherichia coli / Shigella+ADs-99.33+ACU- 179 1228 E…
3+AC0-073+AC0-06+AF8-S1+AF8-C1 SRR1186599+ADs-ILLUMINA+ADs-Paired+ADs-413+ADs-SRX483898 Human Human stool+ADs- Homo sapiens 2009 1 Africa Tanzania University of Maryland Institute for Genome Sciences Escherichia coli PRJNA233712 SRP039693 SAMN02680192 SRS568208 2015+AC0-08+AC0-27 2014+AC0-03+AC0-10 ESC+AF8-BA8531AA Assembled NaN 192462 4861083 Escherichia coli / Shigella+ADs-95.02+ACU- 105 802 ES…
3+AC0-073+AC0-06+AF8-S1+AF8-C2 SRR1186669+ADs-ILLUMINA+ADs-Paired+ADs-447+ADs-SRX483966 Human Human stool+ADs- Homo sapiens 2009 1 Africa Tanzania University of Maryland Institute for Genome Sciences Escherichia coli PRJNA233740 SRP039740 SAMN02680241 SRS568272 2015+AC0-08+AC0-27 2014+AC0-03+AC0-10 ESC+AF8-BA8485AA Assembled NaN 61712 4998010 Escherichia coli / Shigella+ADs-98.73+ACU- 318 2797 ES…
3+AC0-073+AC0-06+AF8-S3+AF8-C1 SRR1186490+ADs-ILLUMINA+ADs-Paired+ADs-474+ADs-SRX483851 Human Human stool+ADs- Homo sapiens 2009 4 Africa Tanzania University of Maryland Institute for Genome Sciences Escherichia coli PRJNA233795 SRP039668 SAMN02680167 SRS568163 2015+AC0-08+AC0-27 2014+AC0-03+AC0-10 ESC+AF8-BA8554AA Assembled NaN 88799 4996706 Escherichia coli / Shigella+ADs-95.26+ACU- 283 2732 ES…
3+AC0-073+AC0-06+AF8-S3+AF8-C2 SRR1186776+ADs-ILLUMINA+ADs-Paired+ADs-483+ADs-SRX484066 Human Human stool+ADs- Homo sapiens 2009 4 Africa Tanzania University of Maryland Institute for Genome Sciences Escherichia coli PRJNA233823 SRP039821 SAMN02687522 SRS568372 2015+AC0-08+AC0-27 2014+AC0-03+AC0-10 ESC+AF8-BA8406AA Assembled NaN 88799 4954366 Escherichia coli / Shigella+ADs-95.95+ACU- 266 2881 ES…
3+AC0-073+AC0-06+AF8-S4+AF8-C1 SRR1186593+ADs-ILLUMINA+ADs-Paired+ADs-479+ADs-SRX483892 Human Human stool+ADs- Homo sapiens 2009 7 Africa Tanzania University of Maryland Institute for Genome Sciences Escherichia coli PRJNA233878 SRP039688 SAMN02680187 SRS568203 2015+AC0-08+AC0-27 2014+AC0-03+AC0-10 ESC+AF8-BA8536AA Assembled NaN 79581 5099907 Escherichia coli / Shigella+ADs-98.0+ACU- 262 2507 ESC…
3+AC0-073+AC0-06+AF8-S4+AF8-C2 SRR1186673+ADs-ILLUMINA+ADs-Paired+ADs-430+ADs-SRX483970 Human Human stool+ADs- Homo sapiens 2009 7 Africa Tanzania University of Maryland Institute for Genome Sciences Escherichia coli PRJNA233906 SRP039744 SAMN02680245 SRS568276 2015+AC0-08+AC0-27 2014+AC0-03+AC0-10 ESC+AF8-BA8481AA Assembled NaN 164184 4699649 Escherichia coli / Shigella+ADs-96.83+ACU- 106 1064 E…
3+AC0-073+AC0-06+AF8-S4+AF8-C3 SRR1186335+ADs-ILLUMINA+ADs-Paired+ADs-462+ADs-SRX483695 Human Human stool+ADs- Homo sapiens 2009 7 Africa Tanzania University of Maryland Institute for Genome Sciences Escherichia coli PRJNA233934 SRP039614 SAMN02680092 SRS568007 2015+AC0-08+AC0-27 2014+AC0-03+AC0-10 ESC+AF8-BA8607AA Assembled NaN 79581 5102453 Escherichia coli / Shigella+ADs-98.4+ACU- 267 2386 ESC…
3+AC0-105+AC0-05+AF8-S1+AF8-C1 SRR1186722+ADs-ILLUMINA+ADs-Paired+ADs-443+ADs-SRX484016 Human Human stool+ADs- Homo sapiens 2009 1 Africa Tanzania University of Maryland Institute for Genome Sciences Escherichia coli PRJNA233713 SRP039773 SAMN02687474 SRS568322 2015+AC0-08+AC0-27 2014+AC0-03+AC0-10 ESC+AF8-BA8454AA Assembled NaN 57917 4966156 Escherichia coli / Shigella+ADs-98.94+ACU- 207 1845 ES…
3+AC0-105+AC0-05+AF8-S1+AF8-C2 SRR1186624+ADs-ILLUMINA+ADs-Paired+ADs-447+ADs-SRX483924 Human Human stool+ADs- Homo sapiens 2009 1 Africa Tanzania University of Maryland Institute for Genome Sciences Escherichia coli PRJNA233741 SRP039701 SAMN02680202 SRS568232 2015+AC0-08+AC0-27 2014+AC0-03+AC0-10 ESC+AF8-BA8524AA Assembled NaN 68786 4875884 Escherichia coli / Shigella+ADs-97.67+ACU- 287 5912 ES…
3+AC0-105+AC0-05+AF8-S1+AF8-C3 SRR1186650+ADs-ILLUMINA+ADs-Paired+ADs-450+ADs-SRX483949 Human Human stool+ADs- Homo sapiens 2009 1 Africa Tanzania University of Maryland Institute for Genome Sciences Escherichia coli PRJNA233767 SRP039725 SAMN02680226 SRS568256 2015+AC0-08+AC0-27 2014+AC0-03+AC0-10 ESC+AF8-BA8500AA Assembled NaN 57917 4965161 Escherichia coli / Shigella+ADs-98.45+ACU- 208 1711 ES…
3+AC0-105+AC0-05+AF8-S3+AF8-C1 SRR1186712+ADs-ILLUMINA+ADs-Paired+ADs-393+ADs-SRX484007 Human Human stool+ADs- Homo sapiens 2009 4 Africa Tanzania University of Maryland Institute for Genome Sciences Escherichia coli PRJNA233796 SRP039764 SAMN02680265 SRS568307 2015+AC0-08+AC0-27 2014+AC0-03+AC0-10 ESC+AF8-BA8461AA Assembled NaN 140089 4955369 Escherichia coli / Shigella+ADs-96.62+ACU- 199 991 ES…
3+AC0-105+AC0-05+AF8-S3+AF8-C2 SRR1186493+ADs-ILLUMINA+ADs-Paired+ADs-404+ADs-SRX483854 Human Human stool+ADs- Homo sapiens 2009 4 Africa Tanzania University of Maryland Institute for Genome Sciences Escherichia coli PRJNA233824 SRP039671 SAMN02680170 SRS568166 2015+AC0-08+AC0-27 2014+AC0-03+AC0-10 ESC+AF8-BA8551AA Assembled NaN 135384 4957070 Escherichia coli / Shigella+ADs-96.64+ACU- 200 1366 E…
3+AC0-105+AC0-05+AF8-S3+AF8-C3 SRR1186721+ADs-ILLUMINA+ADs-Paired+ADs-427+ADs-SRX484015 Human Human stool+ADs- Homo sapiens 2009 4 Africa Tanzania University of Maryland Institute for Genome Sciences Escherichia coli PRJNA233850 SRP039772 SAMN02687473 SRS568321 2015+AC0-08+AC0-27 2014+AC0-03+AC0-10 ESC+AF8-BA8455AA Assembled NaN 66550 4830697 Escherichia coli / Shigella+ADs-96.24+ACU- 203 2638 ES…
3+AC0-105+AC0-05+AF8-S4+AF8-C1 SRR1186769+ADs-ILLUMINA+ADs-Paired+ADs-415+ADs-SRX484059 Human Human stool+ADs- Homo sapiens 2009 7 Africa Tanzania University of Maryland Institute for Genome Sciences Escherichia coli PRJNA233879 SRP039814 SAMN02687515 SRS568365 2015+AC0-08+AC0-27 2014+AC0-03+AC0-10 ESC+AF8-BA8413AA Assembled NaN 175854 4845115 Escherichia coli / Shigella+ADs-98.01+ACU- 117 967 ES…
3+AC0-105+AC0-05+AF8-S4+AF8-C2 SRR1186389+ADs-ILLUMINA+ADs-Paired+ADs-582+ADs-SRX483755 Human Human stool+ADs- Homo sapiens 2009 7 Africa Tanzania University of Maryland Institute for Genome Sciences Escherichia coli PRJNA233907 SRP039629 SAMN02680127 SRS568059 2015+AC0-08+AC0-27 2014+AC0-03+AC0-10 ESC+AF8-BA8591AA Assembled NaN 297664 5194350 Escherichia coli / Shigella+ADs-96.83+ACU- 107 1733 E…
3+AC0-105+AC0-05+AF8-S4+AF8-C3 SRR1186794+ADs-ILLUMINA+ADs-Paired+ADs-437+ADs-SRX484083 Human Human stool+ADs- Homo sapiens 2009 7 Africa Tanzania University of Maryland Institute for Genome Sciences Escherichia coli PRJNA233935 SRP039833 SAMN02687534 SRS568389 2015+AC0-08+AC0-27 2014+AC0-03+AC0-10 ESC+AF8-BA8394AA Assembled NaN 60760 5006491 Escherichia coli / Shigella+ADs-98.29+ACU- 270 2429 ES…
3+AC0-267+AC0-03+AF8-S1+AF8-C1 SRR1186725+ADs-ILLUMINA+ADs-Paired+ADs-424+ADs-SRX484018 Human Human stool+ADs- Homo sapiens 2009 1 Africa Tanzania University of Maryland Institute for Genome Sciences Escherichia coli PRJNA233714 SRP039775 SAMN02687476 SRS568324 2015+AC0-08+AC0-27 2014+AC0-03+AC0-10 ESC+AF8-BA8452AA Assembled NaN 90517 5178005 Escherichia coli / Shigella+ADs-99.09+ACU- 354 2943 ES…
3+AC0-267+AC0-03+AF8-S1+AF8-C2 SRR1186779+ADs-ILLUMINA+ADs-Paired+ADs-405+ADs-SRX484069 Human Human stool+ADs- Homo sapiens 2009 1 Africa Tanzania University of Maryland Institute for Genome Sciences Escherichia coli PRJNA233742 SRP039824 SAMN02687525 SRS568375 2015+AC0-08+AC0-27 2014+AC0-03+AC0-10 ESC+AF8-BA8403AA Assembled NaN 209501 5052409 Escherichia coli / Shigella+ADs-95.96+ACU- 110 1284 E…
3+AC0-267+AC0-03+AF8-S1+AF8-C3 SRR1186355+ADs-ILLUMINA+ADs-Paired+ADs-454+ADs-SRX483717 Human Human stool+ADs- Homo sapiens 2009 1 Africa Tanzania University of Maryland Institute for Genome Sciences Escherichia coli PRJNA233768 SRP039623 SAMN02680103 SRS568030 2015+AC0-08+AC0-27 2014+AC0-03+AC0-10 ESC+AF8-BA8597AA Assembled NaN 90517 5176400 Escherichia coli / Shigella+ADs-99.07+ACU- 352 2909 ES…
3+AC0-267+AC0-03+AF8-S3+AF8-C1 SRR1186785+ADs-ILLUMINA+ADs-Paired+ADs-423+ADs-SRX484075 Human Human stool+ADs- Homo sapiens 2009 4 Africa Tanzania University of Maryland Institute for Genome Sciences Escherichia coli PRJNA233797 SRP039830 SAMN02687531 SRS568381 2015+AC0-08+AC0-27 2014+AC0-03+AC0-10 ESC+AF8-BA8397AA Assembled NaN 90743 4996174 Escherichia coli / Shigella+ADs-97.94+ACU- 219 1596 ES…
3+AC0-267+AC0-03+AF8-S3+AF8-C2 SRR1186594+ADs-ILLUMINA+ADs-Paired+ADs-421+ADs-SRX483893 Human Human stool+ADs- Homo sapiens 2009 4 Africa Tanzania University of Maryland Institute for Genome Sciences Escherichia coli PRJNA233825 SRP039689 SAMN02680188 SRS568204 2015+AC0-08+AC0-27 2014+AC0-03+AC0-10 ESC+AF8-BA8535AA Assembled NaN 235955 4759643 Escherichia coli / Shigella+ADs-98.75+ACU- 96 783 ESC…
3+AC0-267+AC0-03+AF8-S4+AF8-C1 SRR1191669+ADs-ILLUMINA+ADs-Paired+ADs-383+ADs-SRX488751 Human Human stool+ADs- Homo sapiens 2009 7 Africa Tanzania University of Maryland Institute for Genome Sciences Escherichia coli PRJNA233880 SRP040107 SAMN02689048 SRS572276 2015+AC0-08+AC0-27 2014+AC0-03+AC0-13 ESC+AF8-BA8342AA Assembled NaN 115542 5498868 Escherichia coli / Shigella+ADs-99.05+ACU- 477 3395 E…
3+AC0-267+AC0-03+AF8-S4+AF8-C2 SRR1186735+ADs-ILLUMINA+ADs-Paired+ADs-388+ADs-SRX484027 Human Human stool+ADs- Homo sapiens 2009 7 Africa Tanzania University of Maryland Institute for Genome Sciences Escherichia coli PRJNA233908 SRP039784 SAMN02687485 SRS568333 2015+AC0-08+AC0-27 2014+AC0-03+AC0-10 ESC+AF8-BA8443AA Assembled NaN 122920 5137939 Escherichia coli / Shigella+ADs-96.62+ACU- 232 1869 E…
3+AC0-373+AC0-03+AF8-S1+AF8-C1 SRR1186644+ADs-ILLUMINA+ADs-Paired+ADs-484+ADs-SRX483943 Human Human stool+ADs- Homo sapiens 2009 1 Africa Tanzania University of Maryland Institute for Genome Sciences Escherichia coli PRJNA233715 SRP039719 SAMN02680220 SRS568250 2015+AC0-08+AC0-27 2014+AC0-03+AC0-10 ESC+AF8-BA8506AA Assembled NaN 89338 4825999 Escherichia coli / Shigella+ADs-97.48+ACU- 127 4965 ES…
3+AC0-373+AC0-03+AF8-S1+AF8-C2 SRR1186646+ADs-ILLUMINA+ADs-Paired+ADs-491+ADs-SRX483945 Human Human stool+ADs- Homo sapiens 2009 1 Africa Tanzania University of Maryland Institute for Genome Sciences Escherichia coli PRJNA233743 SRP039721 SAMN02680222 SRS568252 2015+AC0-08+AC0-27 2014+AC0-03+AC0-10 ESC+AF8-BA8504AA Assembled NaN 104858 4945566 Escherichia coli / Shigella+ADs-93.12+ACU- 162 3185 E…
3+AC0-373+AC0-03+AF8-S1+AF8-C3 SRR1186645+ADs-ILLUMINA+ADs-Paired+ADs-505+ADs-SRX483944 Human Human stool+ADs- Homo sapiens 2009 1 Africa Tanzania University of Maryland Institute for Genome Sciences Escherichia coli PRJNA233769 SRP039720 SAMN02680221 SRS568251 2015+AC0-08+AC0-27 2014+AC0-03+AC0-10 ESC+AF8-BA8505AA Assembled NaN 104799 4947325 Escherichia coli / Shigella+ADs-92.4+ACU- 163 3374 ES…
3+AC0-373+AC0-03+AF8-S3+AF8-C1 SRR1186753+ADs-ILLUMINA+ADs-Paired+ADs-409+ADs-SRX484043 Human Human stool+ADs- Homo sapiens 2009 4 Africa Tanzania University of Maryland Institute for Genome Sciences Escherichia coli PRJNA233798 SRP039798 SAMN02687499 SRS568349 2015+AC0-08+AC0-27 2014+AC0-03+AC0-10 ESC+AF8-BA8429AA Assembled NaN 85729 4546621 Escherichia coli / Shigella+ADs-96.61+ACU- 137 1455 ES…
3+AC0-373+AC0-03+AF8-S3+AF8-C2 SRR1186636+ADs-ILLUMINA+ADs-Paired+ADs-411+ADs-SRX483935 Human Human stool+ADs- Homo sapiens 2009 4 Africa Tanzania University of Maryland Institute for Genome Sciences Escherichia coli PRJNA233826 SRP039711 SAMN02680212 SRS568242 2015+AC0-08+AC0-27 2014+AC0-03+AC0-10 ESC+AF8-BA8514AA Assembled NaN 206256 4730751 Escherichia coli / Shigella+ADs-92.65+ACU- 88 563 ESC…
3+AC0-373+AC0-03+AF8-S3+AF8-C3 SRR1186469+ADs-ILLUMINA+ADs-Paired+ADs-445+ADs-SRX483830 Human Human stool+ADs- Homo sapiens 2009 4 Africa Tanzania University of Maryland Institute for Genome Sciences Escherichia coli PRJNA233851 SRP039649 SAMN02680147 SRS568143 2015+AC0-08+AC0-27 2014+AC0-03+AC0-10 ESC+AF8-BA8573AA Assembled NaN 206256 4733757 Escherichia coli / Shigella+ADs-93.53+ACU- 100 915 ES…
3+AC0-373+AC0-03+AF8-S4+AF8-C1 SRR1186497+ADs-ILLUMINA+ADs-Paired+ADs-379+ADs-SRX483858	SRR1186496+ADs-ILLUMINA+ADs-Paired+ADs-379+ADs-SRX483857 Human Human stool+ADs- Homo sapiens 2009 7 Africa Tanzania University of Maryland Institute for Genome Sciences Escherichia coli PRJNA233881 SRP039673 SAMN02680173 SRS568169 2015+AC0-08+AC0-27 2014+AC0-03+AC0-10 ESC+AF8-BA8549AA Assembled NaN 136157 5102103 Escherichia coli / Shigella+ADs-95.58+ACU- 242 3919 ESC+AF8-CA0117AA+AF8-AS 2.2
3+AC0-373+AC0-03+AF8-S4+AF8-C2 SRR1186348+ADs-ILLUMINA+ADs-Paired+ADs-389+ADs-SRX483709 Human Human stool+ADs- Homo sapiens 2009 7 Africa Tanzania University of Maryland Institute for Genome Sciences Escherichia coli PRJNA233909 SRP039617 SAMN02680095 SRS568020 2015+AC0-08+AC0-27 2014+AC0-03+AC0-10 ESC+AF8-BA8603AA Assembled NaN 136362 5110388 Escherichia coli / Shigella+ADs-96.18+ACU- 246 4072 E…
3+AC0-373+AC0-03+AF8-S4+AF8-C3 SRR1186763+ADs-ILLUMINA+ADs-Paired+ADs-381+ADs-SRX484053 Human Human stool+ADs- Homo sapiens 2009 7 Africa Tanzania University of Maryland Institute for Genome Sciences Escherichia coli PRJNA233936 SRP039808 SAMN02687509 SRS568359 2015+AC0-08+AC0-27 2014+AC0-03+AC0-10 ESC+AF8-BA8419AA Assembled NaN 136362 5108675 Escherichia coli / Shigella+ADs-95.6+ACU- 249 3208 ES…
3+AC0-475+AC0-03+AF8-S1+AF8-C1 SRR1186667+ADs-ILLUMINA+ADs-Paired+ADs-422+ADs-SRX483964 Human Human stool+ADs- Homo sapiens 2009 1 Africa Tanzania University of Maryland Institute for Genome Sciences Escherichia coli PRJNA233716 SRP039738 SAMN02680239 SRS568270 2015+AC0-08+AC0-27 2014+AC0-03+AC0-10 ESC+AF8-BA8487AA Assembled NaN 82358 4638949 Escherichia coli / Shigella+ADs-87.44+ACU- 178 1609 ES…
3+AC0-475+AC0-03+AF8-S1+AF8-C2 SRR1186690+ADs-ILLUMINA+ADs-Paired+ADs-440+ADs-SRX483985 Human Human stool+ADs- Homo sapiens 2009 1 Africa Tanzania University of Maryland Institute for Genome Sciences Escherichia coli PRJNA233744 SRP039757 SAMN02680258 SRS568289 2015+AC0-08+AC0-27 2014+AC0-03+AC0-10 ESC+AF8-BA8468AA Assembled NaN 120738 5358251 Escherichia coli / Shigella+ADs-97.98+ACU- 238 1731 E…
3+AC0-475+AC0-03+AF8-S3+AF8-C1 SRR1186626+ADs-ILLUMINA+ADs-Paired+ADs-404+ADs-SRX483926 Human Human stool+ADs- Homo sapiens 2009 4 Africa Tanzania University of Maryland Institute for Genome Sciences Escherichia coli PRJNA233799 SRP039703 SAMN02680204 SRS568234 2015+AC0-08+AC0-27 2014+AC0-03+AC0-10 ESC+AF8-BA8522AA Assembled NaN 134873 5145225 Escherichia coli / Shigella+ADs-99.1+ACU- 244 2023 ES…
3+AC0-475+AC0-03+AF8-S3+AF8-C2 SRR1186637+ADs-ILLUMINA+ADs-Paired+ADs-415+ADs-SRX483936 Human Human stool+ADs- Homo sapiens 2009 4 Africa Tanzania University of Maryland Institute for Genome Sciences Escherichia coli PRJNA233827 SRP039712 SAMN02680213 SRS568243 2015+AC0-08+AC0-27 2014+AC0-03+AC0-10 ESC+AF8-BA8513AA Assembled NaN 135543 5320674 Escherichia coli / Shigella+ADs-99.09+ACU- 357 5122 E…
3+AC0-475+AC0-03+AF8-S4+AF8-C1 SRR1186732+ADs-ILLUMINA+ADs-Paired+ADs-381+ADs-SRX484024 Human Human stool+ADs- Homo sapiens 2009 7 Africa Tanzania University of Maryland Institute for Genome Sciences Escherichia coli PRJNA233882 SRP039781 SAMN02687482 SRS568330 2015+AC0-08+AC0-27 2014+AC0-03+AC0-10 ESC+AF8-BA8446AA Assembled NaN 147592 4825458 Escherichia coli / Shigella+ADs-94.93+ACU- 173 898 ES…
3+AC0-475+AC0-03+AF8-S4+AF8-C2 SRR1186707+ADs-ILLUMINA+ADs-Paired+ADs-393+ADs-SRX484002 Human Human stool+ADs- Homo sapiens 2009 7 Africa Tanzania University of Maryland Institute for Genome Sciences Escherichia coli PRJNA233910 SRP039759 SAMN02680260 SRS568302 2015+AC0-08+AC0-27 2014+AC0-03+AC0-10 ESC+AF8-BA8466AA Assembled NaN 61701 4973887 Escherichia coli / Shigella+ADs-99.44+ACU- 194 1640 ES…
4+AC0-203+AC0-08+AF8-S1+AF8-C1 SRR1186363+ADs-ILLUMINA+ADs-Paired+ADs-401+ADs-SRX483725 Human Human stool+ADs- Homo sapiens 2009 1 Africa Tanzania University of Maryland Institute for Genome Sciences Escherichia coli PRJNA233717 SRP039625 SAMN02680105 SRS568036 2015+AC0-08+AC0-27 2014+AC0-03+AC0-10 ESC+AF8-BA8595AA Assembled NaN 137442 5256642 Escherichia coli / Shigella+ADs-99.03+ACU- 332 2573 E…
4+AC0-203+AC0-08+AF8-S1+AF8-C2 SRR1186639+ADs-ILLUMINA+ADs-Paired+ADs-423+ADs-SRX483938 Human Human stool+ADs- Homo sapiens 2009 1 Africa Tanzania University of Maryland Institute for Genome Sciences Escherichia coli PRJNA233745 SRP039714 SAMN02680215 SRS568245 2015+AC0-08+AC0-27 2014+AC0-03+AC0-10 ESC+AF8-BA8511AA Assembled NaN 137443 5256974 Escherichia coli / Shigella+ADs-99.01+ACU- 317 2716 E…
4+AC0-203+AC0-08+AF8-S1+AF8-C3 SRR1186647+ADs-ILLUMINA+ADs-Paired+ADs-414+ADs-SRX483946 Human Human stool+ADs- Homo sapiens 2009 1 Africa Tanzania University of Maryland Institute for Genome Sciences Escherichia coli PRJNA233770 SRP039722 SAMN02680223 SRS568253 2015+AC0-08+AC0-27 2014+AC0-03+AC0-10 ESC+AF8-BA8503AA Assembled NaN 137442 5255028 Escherichia coli / Shigella+ADs-98.95+ACU- 314 2707 E…
4+AC0-203+AC0-08+AF8-S3+AF8-C1 SRR1186390+ADs-ILLUMINA+ADs-Paired+ADs-453+ADs-SRX483756 Human Human stool+ADs- Homo sapiens 2009 4 Africa Tanzania University of Maryland Institute for Genome Sciences Escherichia coli PRJNA233800 SRP039630 SAMN02680128 SRS568060 2015+AC0-08+AC0-27 2014+AC0-03+AC0-10 ESC+AF8-BA8590AA Assembled NaN 92441 4858370 Escherichia coli / Shigella+ADs-98.27+ACU- 188 1709 ES…
4+AC0-203+AC0-08+AF8-S3+AF8-C2 SRR1186666+ADs-ILLUMINA+ADs-Paired+ADs-418+ADs-SRX483963 Human Human stool+ADs- Homo sapiens 2009 4 Africa Tanzania University of Maryland Institute for Genome Sciences Escherichia coli PRJNA233828 SRP039737 SAMN02680238 SRS568269 2015+AC0-08+AC0-27 2014+AC0-03+AC0-10 ESC+AF8-BA8488AA Assembled NaN 123484 4697447 Escherichia coli / Shigella+ADs-98.27+ACU- 131 1520 E…
4+AC0-203+AC0-08+AF8-S3+AF8-C3 SRR1186629+ADs-ILLUMINA+ADs-Paired+ADs-449+ADs-SRX483929 Human Human stool+ADs- Homo sapiens 2009 4 Africa Tanzania University of Maryland Institute for Genome Sciences Escherichia coli PRJNA233853 SRP039706 SAMN02680207 SRS568237 2015+AC0-08+AC0-27 2014+AC0-03+AC0-10 ESC+AF8-BA8519AA Assembled NaN 138363 4696922 Escherichia coli / Shigella+ADs-98.27+ACU- 129 1803 E…
4+AC0-203+AC0-08+AF8-S4+AF8-C2 SRR1186523+ADs-ILLUMINA+ADs-Paired+ADs-407+ADs-SRX483884 Human Human stool+ADs- Homo sapiens 2009 7 Africa Tanzania University of Maryland Institute for Genome Sciences Escherichia coli PRJNA233911 SRP039683 SAMN02680182 SRS568195 2015+AC0-08+AC0-27 2014+AC0-03+AC0-10 ESC+AF8-BA8540AA Assembled NaN 92147 4850315 Escherichia coli / Shigella+ADs-97.92+ACU- 211 1324 ES…
4+AC0-203+AC0-08+AF8-S4+AF8-C3 SRR1186661+ADs-ILLUMINA+ADs-Paired+ADs-403+ADs-SRX483959 Human Human stool+ADs- Homo sapiens 2009 7 Africa Tanzania University of Maryland Institute for Genome Sciences Escherichia coli PRJNA233937 SRP039733 SAMN02680234 SRS568265 2015+AC0-08+AC0-27 2014+AC0-03+AC0-10 ESC+AF8-BA8492AA Assembled NaN 91631 4853138 Escherichia coli / Shigella+ADs-97.89+ACU- 200 1599 ES…
5+AC0-172+AC0-05+AF8-S1+AF8-C3 SRR1186499+ADs-ILLUMINA+ADs-Paired+ADs-425+ADs-SRX483860 Human Human stool+ADs- Homo sapiens 2009 1 Africa Tanzania University of Maryland Institute for Genome Sciences Escherichia coli PRJNA233758 SRP039675 SAMN02680175 SRS568171 2015+AC0-08+AC0-27 2014+AC0-03+AC0-10 ESC+AF8-BA8547AA Assembled 378 73470 4679045 Escherichia coli / Shigella+ADs-97.57+ACU- 219 2598 ES…
5+AC0-172+AC0-05+AF8-S3+AF8-C1 SRR1186767+ADs-ILLUMINA+ADs-Paired+ADs-463+ADs-SRX484057 Human Human stool+ADs- Homo sapiens 2009 4 Africa Tanzania University of Maryland Institute for Genome Sciences Escherichia coli PRJNA233785 SRP039812 SAMN02687513 SRS568363 2015+AC0-08+AC0-27 2014+AC0-03+AC0-10 ESC+AF8-BA8415AA Assembled NaN 92441 4882610 Escherichia coli / Shigella+ADs-96.84+ACU- 200 1473 ES…
5+AC0-172+AC0-05+AF8-S3+AF8-C3 SRR1186768+ADs-ILLUMINA+ADs-Paired+ADs-454+ADs-SRX484058 Human Human stool+ADs- Homo sapiens 2009 4 Africa Tanzania University of Maryland Institute for Genome Sciences Escherichia coli PRJNA233843 SRP039813 SAMN02687514 SRS568364 2015+AC0-08+AC0-27 2014+AC0-03+AC0-10 ESC+AF8-BA8414AA Assembled NaN 80271 5028745 Escherichia coli / Shigella+ADs-98.9+ACU- 210 1735 ESC…
5+AC0-172+AC0-05+AF8-S4+AF8-C1 SRR1186685+ADs-ILLUMINA+ADs-Paired+ADs-398+ADs-SRX483981 Human Human stool+ADs- Homo sapiens 2009 7 Africa Tanzania University of Maryland Institute for Genome Sciences Escherichia coli PRJNA233868 SRP039755 SAMN02680256 SRS568287 2015+AC0-08+AC0-27 2014+AC0-03+AC0-10 ESC+AF8-BA8470AA Assembled NaN 238779 4920329 Escherichia coli / Shigella+ADs-96.43+ACU- 125 927 ES…
5+AC0-172+AC0-05+AF8-S4+AF8-C2 SRR1186757+ADs-ILLUMINA+ADs-Paired+ADs-391+ADs-SRX484047 Human Human stool+ADs- Homo sapiens 2009 7 Africa Tanzania University of Maryland Institute for Genome Sciences Escherichia coli PRJNA233896 SRP039802 SAMN02687503 SRS568353 2015+AC0-08+AC0-27 2014+AC0-03+AC0-10 ESC+AF8-BA8425AA Assembled NaN 187510 4917578 Escherichia coli / Shigella+ADs-98.4+ACU- 143 2487 ES…
5+AC0-172+AC0-05+AF8-S4+AF8-C3 SRR1186723+ADs-ILLUMINA+ADs-Paired+ADs-382+ADs-SRX484017 Human Human stool+ADs- Homo sapiens 2009 7 Africa Tanzania University of Maryland Institute for Genome Sciences Escherichia coli PRJNA233926 SRP039774 SAMN02687475 SRS568323 2015+AC0-08+AC0-27 2014+AC0-03+AC0-10 ESC+AF8-BA8453AA Assembled NaN 187510 4921389 Escherichia coli / Shigella+ADs-97.46+ACU- 142 956 ES…
5+AC0-366+AC0-08+AF8-S1+AF8-C1 SRR1186634+ADs-ILLUMINA+ADs-Paired+ADs-423+ADs-SRX483933 Human Human stool+ADs- Homo sapiens 2009 1 Africa Tanzania University of Maryland Institute for Genome Sciences Escherichia coli PRJNA233704 SRP039709 SAMN02680210 SRS568240 2015+AC0-08+AC0-27 2014+AC0-03+AC0-10 ESC+AF8-BA8516AA Assembled NaN 147915 5429674 Escherichia coli / Shigella+ADs-97.19+ACU- 183 1686 E…
5+AC0-366+AC0-08+AF8-S1+AF8-C3 SRR1191665+ADs-ILLUMINA+ADs-Paired+ADs-429+ADs-SRX488746 Human Human stool+ADs- Homo sapiens 2009 1 Africa Tanzania University of Maryland Institute for Genome Sciences Escherichia coli PRJNA233759 SRP040105 SAMN02689046 SRS572100 2015+AC0-08+AC0-27 2014+AC0-03+AC0-13 ESC+AF8-BA8343AA Assembled NaN 130416 5429681 Escherichia coli / Shigella+ADs-97.58+ACU- 177 1573 E…
5+AC0-366+AC0-08+AF8-S3+AF8-C1 SRR1186617+ADs-ILLUMINA+ADs-Paired+ADs-388+ADs-SRX483917 Human Human stool+ADs- Homo sapiens 2009 4 Africa Tanzania University of Maryland Institute for Genome Sciences Escherichia coli PRJNA233786 SRP039696 SAMN02680196 SRS568226 2015+AC0-08+AC0-27 2014+AC0-03+AC0-10 ESC+AF8-BA8529AA Assembled NaN 220557 5228310 Escherichia coli / Shigella+ADs-98.19+ACU- 119 2346 E…
5+AC0-366+AC0-08+AF8-S3+AF8-C2 SRR1186662+ADs-ILLUMINA+ADs-Paired+ADs-424+ADs-SRX483960 Human Human stool+ADs- Homo sapiens 2009 4 Africa Tanzania University of Maryland Institute for Genome Sciences Escherichia coli PRJNA233814 SRP039734 SAMN02680235 SRS568266 2015+AC0-08+AC0-27 2014+AC0-03+AC0-10 ESC+AF8-BA8491AA Assembled NaN 121015 5216889 Escherichia coli / Shigella+ADs-98.4+ACU- 274 1656 ES…
5+AC0-366+AC0-08+AF8-S3+AF8-C3 SRR1186464+ADs-ILLUMINA+ADs-Paired+ADs-429+ADs-SRX483825 Human Human stool+ADs- Homo sapiens 2009 4 Africa Tanzania University of Maryland Institute for Genome Sciences Escherichia coli PRJNA233844 SRP039645 SAMN02680142 SRS568138 2015+AC0-08+AC0-27 2014+AC0-03+AC0-10 ESC+AF8-BA8577AA Assembled NaN 284172 5231997 Escherichia coli / Shigella+ADs-97.07+ACU- 103 2286 E…
5+AC0-366+AC0-08+AF8-S4+AF8-C1 SRR1191670+ADs-ILLUMINA+ADs-Paired+ADs-391+ADs-SRX488752 Human Human stool+ADs- Homo sapiens 2009 7 Africa Tanzania University of Maryland Institute for Genome Sciences Escherichia coli PRJNA233869 SRP040108 SAMN02689049 SRS572277 2015+AC0-08+AC0-27 2014+AC0-03+AC0-13 ESC+AF8-BA8341AA Assembled NaN 125595 5494606 Escherichia coli / Shigella+ADs-97.6+ACU- 277 2974 ES…
5+AC0-366+AC0-08+AF8-S4+AF8-C2 SRR1186631+ADs-ILLUMINA+ADs-Paired+ADs-381+ADs-SRX483930	SRR1186630+ADs-ILLUMINA+ADs-Paired+ADs-381+ADs-SRX483931 Human Human stool+ADs- Homo sapiens 2009 7 Africa Tanzania University of Maryland Institute for Genome Sciences Escherichia coli PRJNA233897 SRP039707 SAMN02680208 SRS568238 2015+AC0-08+AC0-27 2014+AC0-03+AC0-10 ESC+AF8-BA8518AA Assembled NaN 72227 5010132 Escherichia coli / Shigella+ADs-97.85+ACU- 265 2140 ESC+AF8-CA4309AA+AF8-AS 2.2
6+AC0-175+AC0-07+AF8-S1+AF8-C2 SRR1186625+ADs-ILLUMINA+ADs-Paired+ADs-410+ADs-SRX483925 Human Human stool+ADs- Homo sapiens 2009 1 Africa Tanzania University of Maryland Institute for Genome Sciences Escherichia coli PRJNA233746 SRP039702 SAMN02680203 SRS568233 2015+AC0-08+AC0-27 2014+AC0-03+AC0-10 ESC+AF8-BA8523AA Assembled NaN 147789 5320918 Escherichia coli / Shigella+ADs-96.28+ACU- 186 2067 E…
6+AC0-175+AC0-07+AF8-S1+AF8-C3 SRR1186780+ADs-ILLUMINA+ADs-Paired+ADs-422+ADs-SRX484070 Human Human stool+ADs- Homo sapiens 2009 1 Africa Tanzania University of Maryland Institute for Genome Sciences Escherichia coli PRJNA233771 SRP039825 SAMN02687526 SRS568376 2015+AC0-08+AC0-27 2014+AC0-03+AC0-10 ESC+AF8-BA8402AA Assembled NaN 147789 5321094 Escherichia coli / Shigella+ADs-96.23+ACU- 183 1965 E…
6+AC0-175+AC0-07+AF8-S3+AF8-C1 SRR1186623+ADs-ILLUMINA+ADs-Paired+ADs-441+ADs-SRX483923 Human Human stool+ADs- Homo sapiens 2009 4 Africa Tanzania University of Maryland Institute for Genome Sciences Escherichia coli PRJNA233801 SRP039700 SAMN02680201 SRS568231 2015+AC0-08+AC0-27 2014+AC0-03+AC0-10 ESC+AF8-BA8525AA Assembled NaN 192318 5203288 Escherichia coli / Shigella+ADs-97.19+ACU- 166 1608 E…
6+AC0-175+AC0-07+AF8-S3+AF8-C2 SRR1191671+ADs-ILLUMINA+ADs-Paired+ADs-440+ADs-SRX488753 Human Human stool+ADs- Homo sapiens 2009 4 Africa Tanzania University of Maryland Institute for Genome Sciences Escherichia coli PRJNA233829 SRP040109 SAMN02689050 SRS572278 2015+AC0-08+AC0-27 2014+AC0-03+AC0-13 ESC+AF8-BA8340AA Assembled NaN 194948 5200689 Escherichia coli / Shigella+ADs-97.81+ACU- 157 1329 E…
6+AC0-175+AC0-07+AF8-S3+AF8-C3 SRR1186517+ADs-ILLUMINA+ADs-Paired+ADs-438+ADs-SRX483878 Human Human stool+ADs- Homo sapiens 2009 4 Africa Tanzania University of Maryland Institute for Genome Sciences Escherichia coli PRJNA233854 SRP039677 SAMN02680176 SRS568189 2015+AC0-08+AC0-27 2014+AC0-03+AC0-10 ESC+AF8-BA8546AA Assembled NaN 194948 5202946 Escherichia coli / Shigella+ADs-98.53+ACU- 165 1619 E…
6+AC0-175+AC0-07+AF8-S4+AF8-C1 SRR1186628+ADs-ILLUMINA+ADs-Paired+ADs-408+ADs-SRX483928 Human Human stool+ADs- Homo sapiens 2009 7 Africa Tanzania University of Maryland Institute for Genome Sciences Escherichia coli PRJNA233883 SRP039705 SAMN02680206 SRS568236 2015+AC0-08+AC0-27 2014+AC0-03+AC0-10 ESC+AF8-BA8520AA Assembled NaN 145942 4677811 Escherichia coli / Shigella+ADs-98.23+ACU- 131 1447 E…
6+AC0-175+AC0-07+AF8-S4+AF8-C2 SRR1186784+ADs-ILLUMINA+ADs-Paired+ADs-407+ADs-SRX484074 Human Human stool+ADs- Homo sapiens 2009 7 Africa Tanzania University of Maryland Institute for Genome Sciences Escherichia coli PRJNA233912 SRP039829 SAMN02687530 SRS568380 2015+AC0-08+AC0-27 2014+AC0-03+AC0-10 ESC+AF8-BA8398AA Assembled NaN 145942 4671582 Escherichia coli / Shigella+ADs-98.14+ACU- 124 1382 E…
6+AC0-175+AC0-07+AF8-S4+AF8-C3 SRR1186592+ADs-ILLUMINA+ADs-Paired+ADs-414+ADs-SRX483891 Human Human stool+ADs- Homo sapiens 2009 7 Africa Tanzania University of Maryland Institute for Genome Sciences Escherichia coli PRJNA233938 SRP039687 SAMN02680186 SRS568202 2015+AC0-08+AC0-27 2014+AC0-03+AC0-10 ESC+AF8-BA8537AA Assembled NaN 123484 4698647 Escherichia coli / Shigella+ADs-98.23+ACU- 125 1694 E…
6+AC0-319+AC0-05+AF8-S1+AF8-C1 SRR1186475+ADs-ILLUMINA+ADs-Paired+ADs-391+ADs-SRX483836 Human Human stool+ADs- Homo sapiens 2009 1 Africa Tanzania University of Maryland Institute for Genome Sciences Escherichia coli PRJNA233719 SRP039655 SAMN02680153 SRS568149 2015+AC0-08+AC0-27 2014+AC0-03+AC0-10 ESC+AF8-BA8567AA Assembled NaN 99820 5222968 Escherichia coli / Shigella+ADs-98.68+ACU- 411 2742 ES…
6+AC0-319+AC0-05+AF8-S1+AF8-C2 SRR1186488+ADs-ILLUMINA+ADs-Paired+ADs-428+ADs-SRX483849 Human Human stool+ADs- Homo sapiens 2009 1 Africa Tanzania University of Maryland Institute for Genome Sciences Escherichia coli PRJNA233747 SRP039666 SAMN02680165 SRS568161 2015+AC0-08+AC0-27 2014+AC0-03+AC0-10 ESC+AF8-BA8556AA Assembled NaN 94603 5253304 Escherichia coli / Shigella+ADs-99.14+ACU- 398 3306 ES…
6+AC0-319+AC0-05+AF8-S1+AF8-C3 SRR1186778+ADs-ILLUMINA+ADs-Paired+ADs-431+ADs-SRX484068 Human Human stool+ADs- Homo sapiens 2009 1 Africa Tanzania University of Maryland Institute for Genome Sciences Escherichia coli PRJNA233772 SRP039823 SAMN02687524 SRS568374 2015+AC0-08+AC0-27 2014+AC0-03+AC0-10 ESC+AF8-BA8404AA Assembled NaN 94603 5258517 Escherichia coli / Shigella+ADs-98.69+ACU- 416 3102 ES…
6+AC0-319+AC0-05+AF8-S3+AF8-C1 SRR1186750+ADs-ILLUMINA+ADs-Paired+ADs-425+ADs-SRX484040 Human Human stool+ADs- Homo sapiens 2009 4 Africa Tanzania University of Maryland Institute for Genome Sciences Escherichia coli PRJNA233802 SRP039796 SAMN02687497 SRS568346 2015+AC0-08+AC0-27 2014+AC0-03+AC0-10 ESC+AF8-BA8431AA Assembled NaN 194948 5191539 Escherichia coli / Shigella+ADs-98.54+ACU- 167 1316 E…
6+AC0-319+AC0-05+AF8-S3+AF8-C2 SRR1186736+ADs-ILLUMINA+ADs-Paired+ADs-451+ADs-SRX484028 Human Human stool+ADs- Homo sapiens 2009 4 Africa Tanzania University of Maryland Institute for Genome Sciences Escherichia coli PRJNA233830 SRP039785 SAMN02687486 SRS568334 2015+AC0-08+AC0-27 2014+AC0-03+AC0-10 ESC+AF8-BA8442AA Assembled NaN 194948 5192337 Escherichia coli / Shigella+ADs-98.59+ACU- 160 1625 E…
6+AC0-319+AC0-05+AF8-S3+AF8-C3 SRR1186652+ADs-ILLUMINA+ADs-Paired+ADs-425+ADs-SRX483951 Human Human stool+ADs- Homo sapiens 2009 4 Africa Tanzania University of Maryland Institute for Genome Sciences Escherichia coli PRJNA233855 SRP039726 SAMN02680227 SRS568257 2015+AC0-08+AC0-27 2014+AC0-03+AC0-10 ESC+AF8-BA8499AA Assembled NaN 194948 5153252 Escherichia coli / Shigella+ADs-98.58+ACU- 168 1672 E…
6+AC0-319+AC0-05+AF8-S4+AF8-C2 SRR1186679+ADs-ILLUMINA+ADs-Paired+ADs-444+ADs-SRX483976 Human Human stool+ADs- Homo sapiens 2009 7 Africa Tanzania University of Maryland Institute for Genome Sciences Escherichia coli PRJNA233913 SRP039750 SAMN02680251 SRS568282 2015+AC0-08+AC0-27 2014+AC0-03+AC0-10 ESC+AF8-BA8475AA Assembled NaN 96942 4952217 Escherichia coli / Shigella+ADs-96.49+ACU- 242 3019 ES…
6+AC0-319+AC0-05+AF8-S4+AF8-C3 SRR1186731+ADs-ILLUMINA+ADs-Paired+ADs-592+ADs-SRX484023 Human Human stool+ADs- Homo sapiens 2009 7 Africa Tanzania University of Maryland Institute for Genome Sciences Escherichia coli PRJNA233939 SRP039780 SAMN02687481 SRS568329 2015+AC0-08+AC0-27 2014+AC0-03+AC0-10 ESC+AF8-BA8447AA Assembled NaN 98834 4931629 Escherichia coli / Shigella+ADs-96.47+ACU- 204 2611 ES…
6+AC0-537+AC0-08+AF8-S1+AF8-C1 SRR1186801+ADs-ILLUMINA+ADs-Paired+ADs-457+ADs-SRX484090 Human Human stool+ADs- Homo sapiens 2009 1 Africa Tanzania University of Maryland Institute for Genome Sciences Escherichia coli PRJNA233720 SRP039840 SAMN02687541 SRS568396 2015+AC0-08+AC0-27 2014+AC0-03+AC0-10 ESC+AF8-BA8387AA Assembled NaN 162951 5107267 Escherichia coli / Shigella+ADs-97.46+ACU- 179 2234 E…
6+AC0-537+AC0-08+AF8-S1+AF8-C2 SRR1186737+ADs-ILLUMINA+ADs-Paired+ADs-418+ADs-SRX484029 Human Human stool+ADs- Homo sapiens 2009 1 Africa Tanzania University of Maryland Institute for Genome Sciences Escherichia coli PRJNA233748 SRP039786 SAMN02687487 SRS568335 2015+AC0-08+AC0-27 2014+AC0-03+AC0-10 ESC+AF8-BA8441AA Assembled NaN 162951 5173939 Escherichia coli / Shigella+ADs-98.14+ACU- 223 1731 E…
6+AC0-537+AC0-08+AF8-S1+AF8-C3 SRR1186766+ADs-ILLUMINA+ADs-Paired+ADs-427+ADs-SRX484056 Human Human stool+ADs- Homo sapiens 2009 1 Africa Tanzania University of Maryland Institute for Genome Sciences Escherichia coli PRJNA233773 SRP039811 SAMN02687512 SRS568362 2015+AC0-08+AC0-27 2014+AC0-03+AC0-10 ESC+AF8-BA8416AA Assembled NaN 162951 5178105 Escherichia coli / Shigella+ADs-98.11+ACU- 223 2059 E…
6+AC0-537+AC0-08+AF8-S3+AF8-C1 SRR1186654+ADs-ILLUMINA+ADs-Paired+ADs-439+ADs-SRX483953 Human Human stool+ADs- Homo sapiens 2009 4 Africa Tanzania University of Maryland Institute for Genome Sciences Escherichia coli PRJNA233803 SRP039728 SAMN02680229 SRS568259 2015+AC0-08+AC0-27 2014+AC0-03+AC0-10 ESC+AF8-BA8497AA Assembled NaN 165211 5161279 Escherichia coli / Shigella+ADs-96.02+ACU- 169 1697 E…
6+AC0-537+AC0-08+AF8-S3+AF8-C2 SRR1186480+ADs-ILLUMINA+ADs-Paired+ADs-451+ADs-SRX483841 Human Human stool+ADs- Homo sapiens 2009 4 Africa Tanzania University of Maryland Institute for Genome Sciences Escherichia coli PRJNA233831 SRP039659 SAMN02680158 SRS568154 2015+AC0-08+AC0-27 2014+AC0-03+AC0-10 ESC+AF8-BA8563AA Assembled NaN 165307 5160070 Escherichia coli / Shigella+ADs-96.49+ACU- 160 1452 E…
6+AC0-537+AC0-08+AF8-S3+AF8-C3 SRR1186708+ADs-ILLUMINA+ADs-Paired+ADs-445+ADs-SRX484003 Human Human stool+ADs- Homo sapiens 2009 4 Africa Tanzania University of Maryland Institute for Genome Sciences Escherichia coli PRJNA233856 SRP039760 SAMN02680261 SRS568303 2015+AC0-08+AC0-27 2014+AC0-03+AC0-10 ESC+AF8-BA8465AA Assembled NaN 175125 5160022 Escherichia coli / Shigella+ADs-96.64+ACU- 169 1541 E…
6+AC0-537+AC0-08+AF8-S4+AF8-C1 SRR1186761+ADs-ILLUMINA+ADs-Paired+ADs-394+ADs-SRX484051 Human Human stool+ADs- Homo sapiens 2009 7 Africa Tanzania University of Maryland Institute for Genome Sciences Escherichia coli PRJNA233884 SRP039806 SAMN02687507 SRS568357 2015+AC0-08+AC0-27 2014+AC0-03+AC0-10 ESC+AF8-BA8421AA Assembled NaN 138363 4694948 Escherichia coli / Shigella+ADs-97.34+ACU- 129 1425 E…
6+AC0-537+AC0-08+AF8-S4+AF8-C2 SRR1186663+ADs-ILLUMINA+ADs-Paired+ADs-401+ADs-SRX483961 Human Human stool+ADs- Homo sapiens 2009 7 Africa Tanzania University of Maryland Institute for Genome Sciences Escherichia coli PRJNA233914 SRP039735 SAMN02680236 SRS568267 2015+AC0-08+AC0-27 2014+AC0-03+AC0-10 ESC+AF8-BA8490AA Assembled NaN 145942 4698566 Escherichia coli / Shigella+ADs-98.25+ACU- 130 1635 E…
7+AC0-233+AC0-03+AF8-S1+AF8-C2 SRR1186342+ADs-ILLUMINA+ADs-Paired+ADs-385+ADs-SRX483702 Human Human stool+ADs- Homo sapiens 2009 1 Africa Tanzania University of Maryland Institute for Genome Sciences Escherichia coli PRJNA233732 SRP039615 SAMN02680093 SRS568014 2015+AC0-08+AC0-27 2014+AC0-03+AC0-10 ESC+AF8-BA8605AA Assembled NaN 294452 4682267 Escherichia coli / Shigella+ADs-94.11+ACU- 102 1243 E…
7+AC0-233+AC0-03+AF8-S3+AF8-C1 SRR1186715+ADs-ILLUMINA+ADs-Paired+ADs-463+ADs-SRX484010 Human Human stool+ADs- Homo sapiens 2009 4 Africa Tanzania University of Maryland Institute for Genome Sciences Escherichia coli PRJNA233787 SRP039767 SAMN02687468 SRS568316 2015+AC0-08+AC0-27 2014+AC0-03+AC0-10 ESC+AF8-BA8460AA Assembled NaN 126184 5012066 Escherichia coli / Shigella+ADs-98.05+ACU- 173 1186 E…
7+AC0-233+AC0-03+AF8-S3+AF8-C2 SRR1186473+ADs-ILLUMINA+ADs-Paired+ADs-438+ADs-SRX483834 Human Human stool+ADs- Homo sapiens 2009 4 Africa Tanzania University of Maryland Institute for Genome Sciences Escherichia coli PRJNA233815 SRP039653 SAMN02680151 SRS568147 2015+AC0-08+AC0-27 2014+AC0-03+AC0-10 ESC+AF8-BA8569AA Assembled NaN 79185 5040355 Escherichia coli / Shigella+ADs-98.8+ACU- 264 1506 ESC…
7+AC0-233+AC0-03+AF8-S3+AF8-C3 SRR1186738+ADs-ILLUMINA+ADs-Paired+ADs-391+ADs-SRX484030 Human Human stool+ADs- Homo sapiens 2009 4 Africa Tanzania University of Maryland Institute for Genome Sciences Escherichia coli PRJNA233845 SRP039787 SAMN02687488 SRS568336 2015+AC0-08+AC0-27 2014+AC0-03+AC0-10 ESC+AF8-BA8440AA Assembled NaN 125961 4910947 Escherichia coli / Shigella+ADs-97.98+ACU- 169 1445 E…
7+AC0-233+AC0-03+AF8-S4+AF8-C1 SRR1186792+ADs-ILLUMINA+ADs-Paired+ADs-423+ADs-SRX484081 Human Human stool+ADs- Homo sapiens 2009 7 Africa Tanzania University of Maryland Institute for Genome Sciences Escherichia coli PRJNA233870 SRP039831 SAMN02687532 SRS568387 2015+AC0-08+AC0-27 2014+AC0-03+AC0-10 ESC+AF8-BA8396AA Assembled NaN 153979 4583171 Escherichia coli / Shigella+ADs-97.63+ACU- 91 1013 ES…
7+AC0-233+AC0-03+AF8-S4+AF8-C2 SRR1186674+ADs-ILLUMINA+ADs-Paired+ADs-393+ADs-SRX483971 Human Human stool+ADs- Homo sapiens 2009 7 Africa Tanzania University of Maryland Institute for Genome Sciences Escherichia coli PRJNA233898 SRP039745 SAMN02680246 SRS568277 2015+AC0-08+AC0-27 2014+AC0-03+AC0-10 ESC+AF8-BA8480AA Assembled NaN 160219 4718187 Escherichia coli / Shigella+ADs-91.78+ACU- 77 1019 ES…
7+AC0-233+AC0-03+AF8-S4+AF8-C3 SRR1186470+ADs-ILLUMINA+ADs-Paired+ADs-375+ADs-SRX483831 Human Human stool+ADs- Homo sapiens 2009 7 Africa Tanzania University of Maryland Institute for Genome Sciences Escherichia coli PRJNA233927 SRP039650 SAMN02680148 SRS568144 2015+AC0-08+AC0-27 2014+AC0-03+AC0-10 ESC+AF8-BA8572AA Assembled NaN 153979 4545878 Escherichia coli / Shigella+ADs-97.54+ACU- 92 1066 ES…
8+AC0-415+AC0-05+AF8-S1+AF8-C1 SRR1186793+ADs-ILLUMINA+ADs-Paired+ADs-390+ADs-SRX484082 Human Human stool+ADs- Homo sapiens 2009 1 Africa Tanzania University of Maryland Institute for Genome Sciences Escherichia coli PRJNA233705 SRP039832 SAMN02687533 SRS568388 2015+AC0-08+AC0-27 2014+AC0-03+AC0-10 ESC+AF8-BA8395AA Assembled NaN 106119 4730539 Escherichia coli / Shigella+ADs-98.42+ACU- 150 1773 E…
8+AC0-415+AC0-05+AF8-S1+AF8-C2 SRR1186754+ADs-ILLUMINA+ADs-Paired+ADs-406+ADs-SRX484044 Human Human stool+ADs- Homo sapiens 2009 1 Africa Tanzania University of Maryland Institute for Genome Sciences Escherichia coli PRJNA233733 SRP039799 SAMN02687500 SRS568350 2015+AC0-08+AC0-27 2014+AC0-03+AC0-10 ESC+AF8-BA8428AA Assembled NaN 119609 4818135 Escherichia coli / Shigella+ADs-97.82+ACU- 158 1968 E…
8+AC0-415+AC0-05+AF8-S3+AF8-C1 SRR1186716+ADs-ILLUMINA+ADs-Paired+ADs-396+ADs-SRX484011 Human Human stool+ADs- Homo sapiens 2009 4 Africa Tanzania University of Maryland Institute for Genome Sciences Escherichia coli PRJNA233788 SRP039768 SAMN02687469 SRS568317 2015+AC0-08+AC0-27 2014+AC0-03+AC0-10 ESC+AF8-BA8459AA Assembled NaN 178227 5170628 Escherichia coli / Shigella+ADs-99.07+ACU- 227 1834 E…
8+AC0-415+AC0-05+AF8-S3+AF8-C2 SRR1186717+ADs-ILLUMINA+ADs-Paired+ADs-382+ADs-SRX484012 Human Human stool+ADs- Homo sapiens 2009 4 Africa Tanzania University of Maryland Institute for Genome Sciences Escherichia coli PRJNA233816 SRP039769 SAMN02687470 SRS568318 2015+AC0-08+AC0-27 2014+AC0-03+AC0-10 ESC+AF8-BA8458AA Assembled NaN 178153 5168931 Escherichia coli / Shigella+ADs-99.12+ACU- 241 1599 E…
8+AC0-415+AC0-05+AF8-S3+AF8-C3 SRR1186691+ADs-ILLUMINA+ADs-Paired+ADs-376+ADs-SRX483986 Human Human stool+ADs- Homo sapiens 2009 4 Africa Tanzania University of Maryland Institute for Genome Sciences Escherichia coli PRJNA233846 SRP039758 SAMN02680259 SRS568290 2015+AC0-08+AC0-27 2014+AC0-03+AC0-10 ESC+AF8-BA8467AA Assembled NaN 178227 5169325 Escherichia coli / Shigella+ADs-99.13+ACU- 241 1647 E…
8+AC0-415+AC0-05+AF8-S4+AF8-C1 SRR1186476+ADs-ILLUMINA+ADs-Paired+ADs-389+ADs-SRX483837 Human Human stool+ADs- Homo sapiens 2009 7 Africa Tanzania University of Maryland Institute for Genome Sciences Escherichia coli PRJNA233871 SRP039656 SAMN02680154 SRS568150 2015+AC0-08+AC0-27 2014+AC0-03+AC0-10 ESC+AF8-BA8566AA Assembled NaN 180203 5144018 Escherichia coli / Shigella+ADs-99.0+ACU- 213 1207 ES…
8+AC0-415+AC0-05+AF8-S4+AF8-C2 SRR1186653+ADs-ILLUMINA+ADs-Paired+ADs-382+ADs-SRX483952 Human Human stool+ADs- Homo sapiens 2009 7 Africa Tanzania University of Maryland Institute for Genome Sciences Escherichia coli PRJNA233899 SRP039727 SAMN02680228 SRS568258 2015+AC0-08+AC0-27 2014+AC0-03+AC0-10 ESC+AF8-BA8498AA Assembled NaN 203000 5167468 Escherichia coli / Shigella+ADs-98.63+ACU- 232 2436 E…
8+AC0-415+AC0-05+AF8-S4+AF8-C3 SRR1186393+ADs-ILLUMINA+ADs-Paired+ADs-391+ADs-SRX483759 Human Human stool+ADs- Homo sapiens 2009 7 Africa Tanzania University of Maryland Institute for Genome Sciences Escherichia coli PRJNA233928 SRP039632 SAMN02680131 SRS568074 2015+AC0-08+AC0-27 2014+AC0-03+AC0-10 ESC+AF8-BA8588AA Assembled NaN 177943 5168904 Escherichia coli / Shigella+ADs-99.07+ACU- 239 1619 E…
AA065 ERR1010254+ADs-ILLUMINA+ADs-Paired+ADs-207+ADs-ERX1089278 Human Human Hu Child 2009 Africa Mali STATENS SERUM INSTITUT Escherichia coli O1:H15 PRJEB10700 ERP011986 SAMEA3529341 ERS836490 2015+AC0-11+AC0-04 2015+AC0-11+AC0-03 ESC+AF8-CA3805AA Assembled NaN 92519 5091388 Escherichia coli / Shigella+ADs-96.7+ACU- 165 12127 ESC+AF8-FA6828AA+AF8-AS 2.2
CFSAN010958 SRR3000437+ADs-ILLUMINA+ADs-Paired+ADs-500+ADs-SRX1482408 Human Human Homo sapiens+ADs- Clinical Africa South Africa FDA Center for Food Safety and Applied Nutrition Escherichia coli O121:Nm PRJNA230969 SRP058582 SAMN04316458 SRS1207041 2015+AC0-12+AC0-22 2015+AC0-01+AC0-01 ESC+AF8-CA4837AA Assembled 68 46871 5056065 Escherichia coli / Shigella+ADs-99.53+ACU- 326 9577 ESC+AF8-FA8265AA…
CFSAN018254 SRR3000442+ADs-ILLUMINA+ADs-Paired+ADs-500+ADs-SRX1482413 Human Human Homo sapiens+ADs- Clinical Africa Democratic Republic of the Congo FDA Center for Food Safety and Applied Nutrition Escherichia coli O143 PRJNA230969 SRP058582 SAMN04316473 SRS1207043 2015+AC0-12+AC0-16 2015+AC0-01+AC0-01 ESC+AF8-CA4753AA Assembled 36 62314 5349593 Escherichia coli / Shigella+ADs-99.52+ACU- 290 1432…
DRC+AF8-BKV+AF8-01 ERR2027612+ADs-ILLUMINA+ADs-Paired+ADs-900+ADs-ERX2086764 Human Human homo sapiens+ADs- Homo sapiens 2014 Africa Democratic Republic of the Congo Institut de recherche experimentale et clinique +AC0- IREC Escherichia coli PRJEB21637 ERP023909 SAMEA104153796 ERS1812814 2017+AC0-07+AC0-11 2017+AC0-07+AC0-08 ESC+AF8-GA8212AA Assembled 108 92894 4907145 Escherichia coli / Shigella+…
DRC+AF8-BKV+AF8-02 ERR2027613+ADs-ILLUMINA+ADs-Paired+ADs-900+ADs-ERX2086765 Human Human homo sapiens+ADs- Homo sapiens 2014 Africa Democratic Republic of the Congo Institut de recherche experimentale et clinique +AC0- IREC Escherichia coli PRJEB21637 ERP023909 SAMEA104153797 ERS1812815 2017+AC0-07+AC0-11 2017+AC0-07+AC0-08 ESC+AF8-GA8211AA Assembled 117 296623 5326719 Escherichia coli / Shigella…
DRC+AF8-BKV+AF8-03 ERR2027614+ADs-ILLUMINA+ADs-Paired+ADs-900+ADs-ERX2086766 Human Human homo sapiens+ADs- Homo sapiens 2014 Africa Democratic Republic of the Congo Institut de recherche experimentale et clinique +AC0- IREC Escherichia coli PRJEB21637 ERP023909 SAMEA104153798 ERS1812816 2017+AC0-07+AC0-11 2017+AC0-07+AC0-08 ESC+AF8-GA8210AA Assembled 69 145577 5170524 Escherichia coli / Shigella+…
DRC+AF8-BKV+AF8-04 ERR2027615+ADs-ILLUMINA+ADs-Paired+ADs-900+ADs-ERX2086767 Human Human homo sapiens+ADs- Homo sapiens 2014 Africa Democratic Republic of the Congo Institut de recherche experimentale et clinique +AC0- IREC Escherichia coli PRJEB21637 ERP023909 SAMEA104153799 ERS1812817 2017+AC0-07+AC0-11 2017+AC0-07+AC0-08 ESC+AF8-GA8209AA Assembled 61 235709 5269799 Escherichia coli / Shigella+…
DRC+AF8-BKV+AF8-05 ERR2027616+ADs-ILLUMINA+ADs-Paired+ADs-900+ADs-ERX2086768 Human Human homo sapiens+ADs- Homo sapiens 2014 Africa Democratic Republic of the Congo Institut de recherche experimentale et clinique +AC0- IREC Escherichia coli PRJEB21637 ERP023909 SAMEA104153800 ERS1812818 2017+AC0-07+AC0-11 2017+AC0-07+AC0-08 ESC+AF8-GA8208AA Assembled 68 334309 5268367 Escherichia coli / Shigella+…
DRC+AF8-BKV+AF8-06 ERR2027617+ADs-ILLUMINA+ADs-Paired+ADs-900+ADs-ERX2086769 Human Human homo sapiens+ADs- Homo sapiens 2014 Africa Democratic Republic of the Congo Institut de recherche experimentale et clinique +AC0- IREC Escherichia coli PRJEB21637 ERP023909 SAMEA104153801 ERS1812819 2017+AC0-07+AC0-11 2017+AC0-07+AC0-08 ESC+AF8-GA8207AA Assembled 28 91758 5159364 Escherichia coli / Shigella+A…
DRC+AF8-BKV+AF8-07 ERR2027618+ADs-ILLUMINA+ADs-Paired+ADs-900+ADs-ERX2086770 Human Human homo sapiens+ADs- Homo sapiens 2014 Africa Democratic Republic of the Congo Institut de recherche experimentale et clinique +AC0- IREC Escherichia coli PRJEB21637 ERP023909 SAMEA104153802 ERS1812820 2017+AC0-07+AC0-11 2017+AC0-07+AC0-08 ESC+AF8-GA8206AA Assembled 28 131623 5169291 Escherichia coli / Shigella+…
DRC+AF8-BKV+AF8-08 ERR2027619+ADs-ILLUMINA+ADs-Paired+ADs-900+ADs-ERX2086771 Human Human homo sapiens+ADs- Homo sapiens 2014 Africa Democratic Republic of the Congo Institut de recherche experimentale et clinique +AC0- IREC Escherichia coli PRJEB21637 ERP023909 SAMEA104153803 ERS1812821 2017+AC0-07+AC0-11 2017+AC0-07+AC0-08 ESC+AF8-GA8205AA Assembled 55 48330 4755496 Escherichia coli / Shigella+A…
DRC+AF8-BKV+AF8-09 ERR2027620+ADs-ILLUMINA+ADs-Paired+ADs-900+ADs-ERX2086772 Human Human homo sapiens+ADs- Homo sapiens 2014 Africa Democratic Republic of the Congo Institut de recherche experimentale et clinique +AC0- IREC Escherichia coli PRJEB21637 ERP023909 SAMEA104153804 ERS1812822 2017+AC0-07+AC0-11 2017+AC0-07+AC0-08 ESC+AF8-GA8204AA Assembled 76 103682 5182165 Escherichia coli / Shigella+…
DRC+AF8-BKV+AF8-10 ERR2027621+ADs-ILLUMINA+ADs-Paired+ADs-900+ADs-ERX2086773 Human Human homo sapiens+ADs- Homo sapiens 2014 Africa Democratic Republic of the Congo Institut de recherche experimentale et clinique +AC0- IREC Escherichia coli PRJEB21637 ERP023909 SAMEA104153805 ERS1812823 2017+AC0-07+AC0-11 2017+AC0-07+AC0-08 ESC+AF8-GA8203AA Assembled 70 109394 5184372 Escherichia coli / Shigella+…
DRC+AF8-BKV+AF8-11 ERR2027622+ADs-ILLUMINA+ADs-Paired+ADs-900+ADs-ERX2086774 Human Human homo sapiens+ADs- Homo sapiens 2014 Africa Democratic Republic of the Congo Institut de recherche experimentale et clinique +AC0- IREC Escherichia coli PRJEB21637 ERP023909 SAMEA104153806 ERS1812824 2017+AC0-07+AC0-11 2017+AC0-07+AC0-08 ESC+AF8-GA8202AA Assembled 88 110270 5215340 Escherichia coli / Shigella+…
DRC+AF8-BKV+AF8-12 ERR2027623+ADs-ILLUMINA+ADs-Paired+ADs-900+ADs-ERX2086775 Human Human homo sapiens+ADs- Homo sapiens 2014 Africa Democratic Republic of the Congo Institut de recherche experimentale et clinique +AC0- IREC Escherichia coli PRJEB21637 ERP023909 SAMEA104153807 ERS1812825 2017+AC0-07+AC0-11 2017+AC0-07+AC0-08 ESC+AF8-GA8201AA Assembled 65 164069 5335751 Escherichia coli / Shigella+…
DRC+AF8-BKV+AF8-13 ERR2027624+ADs-ILLUMINA+ADs-Paired+ADs-900+ADs-ERX2086776 Human Human homo sapiens+ADs- Homo sapiens 2014 Africa Democratic Republic of the Congo Institut de recherche experimentale et clinique +AC0- IREC Escherichia coli PRJEB21637 ERP023909 SAMEA104153808 ERS1812826 2017+AC0-07+AC0-11 2017+AC0-07+AC0-08 ESC+AF8-GA8200AA Assembled 53 129047 5285339 Escherichia coli / Shigella+…
DRC+AF8-BKV+AF8-14 ERR2027625+ADs-ILLUMINA+ADs-Paired+ADs-900+ADs-ERX2086777 Human Human homo sapiens+ADs- Homo sapiens 2014 Africa Democratic Republic of the Congo Institut de recherche experimentale et clinique +AC0- IREC Escherichia coli PRJEB21637 ERP023909 SAMEA104153809 ERS1812827 2017+AC0-07+AC0-11 2017+AC0-07+AC0-08 ESC+AF8-GA8199AA Assembled 69 187959 5266716 Escherichia coli / Shigella+…
DRC+AF8-BKV+AF8-15 ERR2027626+ADs-ILLUMINA+ADs-Paired+ADs-900+ADs-ERX2086778 Human Human homo sapiens+ADs- Homo sapiens 2014 Africa Democratic Republic of the Congo Institut de recherche experimentale et clinique +AC0- IREC Escherichia coli PRJEB21637 ERP023909 SAMEA104153810 ERS1812828 2017+AC0-07+AC0-11 2017+AC0-07+AC0-08 ESC+AF8-GA8198AA Assembled 68 69920 4915259 Escherichia coli / Shigella+A…
DRC+AF8-BKV+AF8-16 ERR2027627+ADs-ILLUMINA+ADs-Paired+ADs-900+ADs-ERX2086779 Human Human homo sapiens+ADs- Homo sapiens 2014 Africa Democratic Republic of the Congo Institut de recherche experimentale et clinique +AC0- IREC Escherichia coli PRJEB21637 ERP023909 SAMEA104153811 ERS1812829 2017+AC0-07+AC0-11 2017+AC0-07+AC0-08 ESC+AF8-GA8197AA Assembled 32 117431 5244895 Escherichia coli / Shigella+…
Ec12+AC0-0466 SRR926308+ADs-ILLUMINA+ADs-Paired+ADs-5000+ADs-SRX147982	SRR926307+ADs-ILLUMINA+ADs-Paired+ADs-180+ADs-SRX149981	SRR576997+ADs-ILLUMINA+ADs-Paired+ADs-190+ADs-SRX189832	SRR497016+ADs-ILLUMINA+ADs-Paired+ADs-194+ADs-SRX147984	SRR926310+ADs-ILLUMINA+ADs-Paired+ADs-5000+ADs-SRX147982	SRR501455+ADs-ILLUMINA+ADs-Paired+ADs-194+ADs-SRX149983	SRR926309+ADs-ILLUMINA+ADs-Paired+ADs-180+ADs-SRX160355 Human Human Homo sapiens+ADs- Stool 2011 12 Africa Algeria Alger Broad Institute Escherichia coli PRJNA88165 SRP027348 SAMN00809013 SRS457301 2015+AC0-08+AC0-27 2012+AC0-09+AC0-27 ESC+AF8-CA0824AA Assembled NaN 83352 5306312 Escherichia coli / Shigella+ADs-97.87+ACU- 593 20072 ESC+AF8-CA4082AA+AF8-AS 2.2
Ecol+AF8-745 GCF+AF8-001618345+ADs-Complete Genome+ADsAOwA7- Human Human Homo sapiens 2012 Africa Morocco Rabat+AC0-Sale+AC0-Zemmour+AC0-Zaer Rabat Rabat 34.04 +AC0-6.75 University of Oxford Escherichia coli PRJNA224116 SAMN04590095 2016+AC0-12+AC0-16 2016+AC0-07+AC0-12 ESC+AF8-FA5491AA Assembled NaN NaN NaN NaN NaN ESC+AF8-KA7824AA+AF8-AS NaN
EcSA01 DRR051041+ADs-ILLUMINA+ADs-Paired+ADs-500+ADs-DRX045933 Human Air Homo sapiens+ADs- environmental material+ADs- organic material 2008 Africa South Africa CALGARY Escherichia coli PRJDB4303 DRP003215 SAMD00044976 DRS034176 2016+AC0-09+AC0-24 2016+AC0-09+AC0-23 ESC+AF8-EA6140AA Assembled 71 181177 5209304 Escherichia coli / Shigella+ADs-98.84+ACU- 124 2710 ESC+AF8-JA1122AA+AF8-AS 3.51
MOD1+AC0-EC6736 SRR3957096+ADs-ILLUMINA+ADs-Paired+ADs-300+ADs-SRX1981106 Human Human Homo sapiens+ADs- homo sapiens+AC0-Intestine 1994 2 Africa Zambia FDA Center for Food Safety and Applied Nutrition Escherichia coli O18:H10 PRJNA230969 SRP058582 SAMN04992567 SRS1588550 2016+AC0-07+AC0-28 2015+AC0-01+AC0-01 ESC+AF8-EA1698AA Assembled 197 265386 5164840 Escherichia coli / Shigella+ADs-98.81+ACU- …
MOD1+AC0-EC6737 SRR3975541+ADs-ILLUMINA+ADs-Paired+ADs-500+ADs-SRX1984854 Human Human Homo sapiens+ADs- homo sapiens+AC0-Intestine 1994 2 Africa Zambia FDA Center for Food Safety and Applied Nutrition Escherichia coli O21 PRJNA230969 SRP058582 SAMN04992568 SRS1590115 2016+AC0-07+AC0-29 2015+AC0-01+AC0-01 ESC+AF8-EA2093AA Assembled 119 105663 4800412 Escherichia coli / Shigella+ADs-97.55+ACU- 168 …
MOD1+AC0-EC6738 SRR5185888+ADs-ILLUMINA+ADs-Paired+ADs-300+ADs-SRX2501909 Human Human Homo sapiens+ADs- homo sapiens+AC0-Intestine 1994 2 Africa Zambia FDA Center for Food Safety and Applied Nutrition Escherichia coli O9:H10 PRJNA230969 SRP058582 SAMN04992569 SRS1928029 2017+AC0-01+AC0-19 2015+AC0-01+AC0-01 ESC+AF8-FA7694AA Assembled 70 76731 4975469 Escherichia coli / Shigella+ADs-85.44+ACU- 248…
MOD1+AC0-EC6739 SRR5185890+ADs-ILLUMINA+ADs-Paired+ADs-300+ADs-SRX2501911 Human Human Homo sapiens+ADs- homo sapiens+AC0-Intestine 1994 2 Africa Zambia FDA Center for Food Safety and Applied Nutrition Escherichia coli O34:H10 PRJNA230969 SRP058582 SAMN04992570 SRS1928031 2017+AC0-01+AC0-19 2015+AC0-01+AC0-01 ESC+AF8-FA7692AA Assembled 67 116692 4903125 Escherichia coli / Shigella+ADs-99.18+ACU- 1…
MOD1+AC0-EC6740 SRR5185889+ADs-ILLUMINA+ADs-Paired+ADs-300+ADs-SRX2501910 Human Human Homo sapiens+ADs- homo sapiens+AC0-Intestine 1994 2 Africa Zambia FDA Center for Food Safety and Applied Nutrition Escherichia coli O5 PRJNA230969 SRP058582 SAMN04992571 SRS1928030 2017+AC0-01+AC0-19 2015+AC0-01+AC0-01 ESC+AF8-FA7693AA Assembled 55 77284 4776927 Escherichia coli / Shigella+ADs-98.41+ACU- 145 513…
MOD1+AC0-EC6741 SRR3974400+ADs-ILLUMINA+ADs-Paired+ADs-300+ADs-SRX1984683 Human Human Homo sapiens+ADs- homo sapiens+AC0-Intestine 1994 2 Africa Zambia FDA Center for Food Safety and Applied Nutrition Escherichia coli O91:H29 PRJNA230969 SRP058582 SAMN04992572 SRS1590015 2016+AC0-07+AC0-29 2015+AC0-01+AC0-01 ESC+AF8-EA2152AA Assembled 152 185606 4830910 Escherichia coli / Shigella+ADs-98.69+ACU- …
MOD1+AC0-EC6742 SRR3974401+ADs-ILLUMINA+ADs-Paired+ADs-300+ADs-SRX1984727 Human Human Homo sapiens+ADs- homo sapiens+AC0-Intestine 1994 2 Africa Zambia FDA Center for Food Safety and Applied Nutrition Escherichia coli O154 PRJNA230969 SRP058582 SAMN04992573 SRS1590028 2016+AC0-07+AC0-29 2015+AC0-01+AC0-01 ESC+AF8-EA2151AA Assembled 126 143405 4571796 Escherichia coli / Shigella+ADs-98.39+ACU- 86 …
MOD1+AC0-EC6744 SRR3974429+ADs-ILLUMINA+ADs-Paired+ADs-300+ADs-SRX1984749 Human Human Homo sapiens+ADs- homo sapiens+AC0-Intestine 1994 2 Africa Zambia FDA Center for Food Safety and Applied Nutrition Escherichia coli O6:H10 PRJNA230969 SRP058582 SAMN04992575 SRS1590035 2016+AC0-07+AC0-29 2015+AC0-01+AC0-01 ESC+AF8-EA2149AA Assembled 81 165365 5343271 Escherichia coli / Shigella+ADs-100.0+ACU- 15…
MOD1+AC0-EC6746 SRR3974563+ADs-ILLUMINA+ADs-Paired+ADs-300+ADs-SRX1984777 Human Human Homo sapiens+ADs- homo sapiens+AC0-Intestine 1994 2 Africa Zambia FDA Center for Food Safety and Applied Nutrition Escherichia coli O21 PRJNA230969 SRP058582 SAMN04992577 SRS1590044 2016+AC0-07+AC0-29 2015+AC0-01+AC0-01 ESC+AF8-EA2147AA Assembled 83 79796 5075901 Escherichia coli / Shigella+ADs-98.84+ACU- 274 36…
MOD1+AC0-EC6747 SRR5330891+ADs-ILLUMINA+ADs-Paired+ADs-300+ADs-SRX2629886 Human Human Homo sapiens+ADs- homo sapiens+AC0-Intestine 1994 2 Africa Zambia FDA Center for Food Safety and Applied Nutrition Escherichia coli O8 PRJNA230969 SRP058582 SAMN04992578 SRS2039723 2017+AC0-03+AC0-10 2017+AC0-03+AC0-09 ESC+AF8-GA0235AA Assembled 122 201724 5027668 Escherichia coli / Shigella+ADs-100.0+ACU- 111 8…
MOD1+AC0-EC6748 SRR3957097+ADs-ILLUMINA+ADs-Paired+ADs-300+ADs-SRX1981107 Human Human Homo sapiens+ADs- homo sapiens+AC0-Intestine 1994 2 Africa Zambia FDA Center for Food Safety and Applied Nutrition Escherichia coli O11:H16 PRJNA230969 SRP058582 SAMN04992579 SRS1588551 2016+AC0-07+AC0-28 2015+AC0-01+AC0-01 ESC+AF8-EA1697AA Assembled 185 89426 4997497 Escherichia coli / Shigella+ADs-98.25+ACU- 2…
MOD1+AC0-EC6749 SRR3974586+ADs-ILLUMINA+ADs-Paired+ADs-300+ADs-SRX1984781 Human Human Homo sapiens+ADs- homo sapiens+AC0-Intestine 1994 2 Africa Zambia FDA Center for Food Safety and Applied Nutrition Escherichia coli O88 PRJNA230969 SRP058582 SAMN04992580 SRS1590046 2016+AC0-07+AC0-29 2015+AC0-01+AC0-01 ESC+AF8-EA2146AA Assembled 160 143557 5083453 Escherichia coli / Shigella+ADs-100.0+ACU- 124 …
MOD1+AC0-EC6750 SRR3974639+ADs-ILLUMINA+ADs-Paired+ADs-300+ADs-SRX1984782 Human Human Homo sapiens+ADs- homo sapiens+AC0-Intestine 1994 2 Africa Zambia FDA Center for Food Safety and Applied Nutrition Escherichia coli O25 PRJNA230969 SRP058582 SAMN04992581 SRS1590047 2016+AC0-07+AC0-29 2015+AC0-01+AC0-01 ESC+AF8-EA2145AA Assembled 160 89280 4985081 Escherichia coli / Shigella+ADs-97.98+ACU- 200 2…
MOD1+AC0-EC6752 SRR3974660+ADs-ILLUMINA+ADs-Paired+ADs-300+ADs-SRX1984783 Human Human Homo sapiens+ADs- homo sapiens+AC0-Intestine 1994 2 Africa Zambia FDA Center for Food Safety and Applied Nutrition Escherichia coli O8 PRJNA230969 SRP058582 SAMN04992583 SRS1590048 2016+AC0-07+AC0-29 2015+AC0-01+AC0-01 ESC+AF8-EA2144AA Assembled 169 167154 4806039 Escherichia coli / Shigella+ADs-98.74+ACU- 117 1…
MOD1+AC0-EC6753 SRR3974661+ADs-ILLUMINA+ADs-Paired+ADs-300+ADs-SRX1984784 Human Human Homo sapiens+ADs- homo sapiens+AC0-Intestine 1994 2 Africa Zambia FDA Center for Food Safety and Applied Nutrition Escherichia coli O103 PRJNA230969 SRP058582 SAMN04992584 SRS1590049 2016+AC0-07+AC0-29 2015+AC0-01+AC0-01 ESC+AF8-EA2143AA Assembled 156 147908 4870352 Escherichia coli / Shigella+ADs-96.6+ACU- 176 …
MOD1+AC0-EC6754 SRR3974685+ADs-ILLUMINA+ADs-Paired+ADs-300+ADs-SRX1984785 Human Human Homo sapiens+ADs- homo sapiens+AC0-Intestine 1994 2 Africa Zambia FDA Center for Food Safety and Applied Nutrition Escherichia coli O81 PRJNA230969 SRP058582 SAMN04992585 SRS1590050 2016+AC0-07+AC0-29 2015+AC0-01+AC0-01 ESC+AF8-EA2142AA Assembled 142 117366 5116198 Escherichia coli / Shigella+ADs-99.5+ACU- 228 2…
MOD1+AC0-EC6755 SRR3974733+ADs-ILLUMINA+ADs-Paired+ADs-300+ADs-SRX1984786 Human Human Homo sapiens+ADs- homo sapiens+AC0-Intestine 1994 2 Africa Zambia FDA Center for Food Safety and Applied Nutrition Escherichia coli O15 PRJNA230969 SRP058582 SAMN04992586 SRS1590051 2016+AC0-07+AC0-29 2015+AC0-01+AC0-01 ESC+AF8-EA2141AA Assembled 103 98007 5077698 Escherichia coli / Shigella+ADs-100.0+ACU- 239 2…
MOD1+AC0-EC6756 SRR3974848+ADs-ILLUMINA+ADs-Paired+ADs-300+ADs-SRX1984787 Human Human Homo sapiens+ADs- homo sapiens+AC0-Intestine 1994 2 Africa Zambia FDA Center for Food Safety and Applied Nutrition Escherichia coli O12 PRJNA230969 SRP058582 SAMN04992587 SRS1590052 2016+AC0-07+AC0-29 2015+AC0-01+AC0-01 ESC+AF8-EA2140AA Assembled 103 119119 5221492 Escherichia coli / Shigella+ADs-99.25+ACU- 257 …
MOD1+AC0-EC6757 SRR3974849+ADs-ILLUMINA+ADs-Paired+ADs-300+ADs-SRX1984788 Human Human Homo sapiens+ADs- homo sapiens+AC0-Intestine 1994 2 Africa Zambia FDA Center for Food Safety and Applied Nutrition Escherichia coli O165 PRJNA230969 SRP058582 SAMN04992588 SRS1590053 2016+AC0-07+AC0-29 2015+AC0-01+AC0-01 ESC+AF8-EA2139AA Assembled 98 55410 4984971 Escherichia coli / Shigella+ADs-99.16+ACU- 289 4…
MOD1+AC0-EC6758 SRR3974850+ADs-ILLUMINA+ADs-Paired+ADs-300+ADs-SRX1984789 Human Human Homo sapiens+ADs- homo sapiens+AC0-Intestine 1994 2 Africa Zambia FDA Center for Food Safety and Applied Nutrition Escherichia coli O105 PRJNA230969 SRP058582 SAMN04992589 SRS1590054 2016+AC0-07+AC0-29 2015+AC0-01+AC0-01 ESC+AF8-EA2138AA Assembled 83 244684 4978284 Escherichia coli / Shigella+ADs-88.9+ACU- 119 2…
MOD1+AC0-EC6759 SRR3974851+ADs-ILLUMINA+ADs-Paired+ADs-300+ADs-SRX1984790 Human Human Homo sapiens+ADs- homo sapiens+AC0-Intestine 1994 2 Africa Zambia FDA Center for Food Safety and Applied Nutrition Escherichia coli O222 PRJNA230969 SRP058582 SAMN04992590 SRS1590055 2016+AC0-07+AC0-29 2015+AC0-01+AC0-01 ESC+AF8-EA2137AA Assembled 103 119433 5125946 Escherichia coli / Shigella+ADs-98.18+ACU- 224…
MOD1+AC0-EC6760 SRR3974852+ADs-ILLUMINA+ADs-Paired+ADs-300+ADs-SRX1984791 Human Human Homo sapiens+ADs- homo sapiens+AC0-Intestine 1994 2 Africa Zambia FDA Center for Food Safety and Applied Nutrition Escherichia coli O103:H27 PRJNA230969 SRP058582 SAMN04992591 SRS1590056 2016+AC0-07+AC0-29 2015+AC0-01+AC0-01 ESC+AF8-EA2136AA Assembled 99 293447 5175964 Escherichia coli / Shigella+ADs-91.52+ACU- …
MOD1+AC0-EC6761 SRR3974853+ADs-ILLUMINA+ADs-Paired+ADs-300+ADs-SRX1984792 Human Human Homo sapiens+ADs- homo sapiens+AC0-Intestine 1994 2 Africa Zambia FDA Center for Food Safety and Applied Nutrition Escherichia coli O107:H5 PRJNA230969 SRP058582 SAMN04992592 SRS1590057 2016+AC0-07+AC0-29 2015+AC0-01+AC0-01 ESC+AF8-EA2135AA Assembled 140 119589 5178931 Escherichia coli / Shigella+ADs-99.19+ACU- …
MOD1+AC0-EC6762 SRR3974854+ADs-ILLUMINA+ADs-Paired+ADs-300+ADs-SRX1984793 Human Human Homo sapiens+ADs- homo sapiens+AC0-Intestine 1994 2 Africa Zambia FDA Center for Food Safety and Applied Nutrition Escherichia coli O18 PRJNA230969 SRP058582 SAMN04992593 SRS1590058 2016+AC0-07+AC0-29 2015+AC0-01+AC0-01 ESC+AF8-EA2134AA Assembled 185 213291 5374977 Escherichia coli / Shigella+ADs-93.3+ACU- 181 2…
MOD1+AC0-EC6763 SRR5185892+ADs-ILLUMINA+ADs-Paired+ADs-300+ADs-SRX2501913 Human Human Homo sapiens+ADs- homo sapiens+AC0-Intestine 1994 2 Africa Zambia FDA Center for Food Safety and Applied Nutrition Escherichia coli O8 PRJNA230969 SRP058582 SAMN04992594 SRS1928033 2017+AC0-01+AC0-19 2015+AC0-01+AC0-01 ESC+AF8-FA7690AA Assembled 66 99620 5272205 Escherichia coli / Shigella+ADs-99.21+ACU- 145 477…
MOD1+AC0-EC6766 SRR5185891+ADs-ILLUMINA+ADs-Paired+ADs-300+ADs-SRX2501912 Human Human Homo sapiens+ADs- homo sapiens+AC0-Intestine 1994 2 Africa Zambia FDA Center for Food Safety and Applied Nutrition Escherichia coli O148 PRJNA230969 SRP058582 SAMN04992597 SRS1928032 2017+AC0-01+AC0-19 2015+AC0-01+AC0-01 ESC+AF8-FA7691AA Assembled 51 134828 4767592 Escherichia coli / Shigella+ADs-90.8+ACU- 117 3…
MOD1+AC0-EC6767 SRR5187828+ADs-ILLUMINA+ADs-Paired+ADs-300+ADs-SRX2503748 Human Human Homo sapiens+ADs- homo sapiens+AC0-Intestine 1994 2 Africa Zambia FDA Center for Food Safety and Applied Nutrition Escherichia coli O85:H10 PRJNA230969 SRP058582 SAMN04992105 SRS1928880 2017+AC0-01+AC0-19 2015+AC0-01+AC0-01 ESC+AF8-FA7772AA Assembled 79 133568 5086113 Escherichia coli / Shigella+ADs-99.25+ACU- 1…
MOD1+AC0-EC6768 SRR5330894+ADs-ILLUMINA+ADs-Paired+ADs-300+ADs-SRX2629889 Human Human Homo sapiens+ADs- homo sapiens+AC0-Intestine 1994 2 Africa Zambia FDA Center for Food Safety and Applied Nutrition Escherichia coli O29:H10 PRJNA230969 SRP058582 SAMN04992116 SRS2039725 2017+AC0-03+AC0-10 2017+AC0-03+AC0-09 ESC+AF8-GA0232AA Assembled 190 104716 4747271 Escherichia coli / Shigella+ADs-92.77+ACU- …
MOD1+AC0-EC6769 SRR3971773+ADs-ILLUMINA+ADs-Paired+ADs-300+ADs-SRX1984023 Human Human Homo sapiens+ADs- homo sapiens+AC0-Intestine 1994 2 Africa Zambia FDA Center for Food Safety and Applied Nutrition Escherichia coli O8 PRJNA230969 SRP058582 SAMN04992117 SRS1589742 2016+AC0-07+AC0-29 2015+AC0-01+AC0-01 ESC+AF8-EA2209AA Assembled 96 78090 4824844 Escherichia coli / Shigella+ADs-95.77+ACU- 188 376…
MOD1+AC0-EC6770 SRR3971774+ADs-ILLUMINA+ADs-Paired+ADs-300+ADs-SRX1984024 Human Human Homo sapiens+ADs- homo sapiens+AC0-Intestine 1994 2 Africa Zambia FDA Center for Food Safety and Applied Nutrition Escherichia coli O114 PRJNA230969 SRP058582 SAMN04992118 SRS1589743 2016+AC0-07+AC0-29 2015+AC0-01+AC0-01 ESC+AF8-EA2208AA Assembled 105 124322 4734105 Escherichia coli / Shigella+ADs-98.14+ACU- 126…
MOD1+AC0-EC6771 SRR3972127+ADs-ILLUMINA+ADs-Paired+ADs-300+ADs-SRX1984029 Human Human Homo sapiens+ADs- homo sapiens+AC0-Intestine 1994 2 Africa Zambia FDA Center for Food Safety and Applied Nutrition Escherichia coli O8 PRJNA230969 SRP058582 SAMN04992119 SRS1589745 2016+AC0-07+AC0-29 2015+AC0-01+AC0-01 ESC+AF8-EA2207AA Assembled 91 124346 5039962 Escherichia coli / Shigella+ADs-93.79+ACU- 180 64…
MOD1+AC0-EC6772 SRR3957085+ADs-ILLUMINA+ADs-Paired+ADs-300+ADs-SRX1981095 Human Human Homo sapiens+ADs- homo sapiens+AC0-Intestine 1994 2 Africa Zambia FDA Center for Food Safety and Applied Nutrition Escherichia coli O148 PRJNA230969 SRP058582 SAMN04992120 SRS1588539 2016+AC0-07+AC0-28 2015+AC0-01+AC0-01 ESC+AF8-EA1709AA Assembled 93 66659 4518046 Escherichia coli / Shigella+ADs-100.0+ACU- 150 4…
MOD1+AC0-EC6773 SRR5330895+ADs-ILLUMINA+ADs-Paired+ADs-300+ADs-SRX2629890 Human Human Homo sapiens+ADs- homo sapiens+AC0-Intestine 1994 2 Africa Zambia FDA Center for Food Safety and Applied Nutrition Escherichia coli O113 PRJNA230969 SRP058582 SAMN04992121 SRS2039726 2017+AC0-03+AC0-10 2017+AC0-03+AC0-09 ESC+AF8-GA0231AA Assembled 67 120330 5018511 Escherichia coli / Shigella+ADs-90.15+ACU- 101 …
MOD1+AC0-EC6774 SRR3972130+ADs-ILLUMINA+ADs-Paired+ADs-300+ADs-SRX1984034	SRR3974856+ADs-ILLUMINA+ADs-Paired+ADs-300+ADs-SRX1984795 Human Human Homo sapiens+ADs- homo sapiens+AC0-Intestine 1994 2 Africa Zambia FDA Center for Food Safety and Applied Nutrition Escherichia coli O15 PRJNA230969 SRP058582 SAMN04992122 SRS1589747 2016+AC0-07+AC0-29 2015+AC0-01+AC0-01 ESC+AF8-EA2132AA Assembled 108 150918 5082214 Escherichia coli / Shigella+ADs-99.3+ACU- 203 2546 ESC+AF8-HA79…
MOD1+AC0-EC6775 SRR3974857+ADs-ILLUMINA+ADs-Paired+ADs-300+ADs-SRX1984796 Human Human Homo sapiens+ADs- homo sapiens+AC0-Intestine 1994 2 Africa Zambia FDA Center for Food Safety and Applied Nutrition Escherichia coli O86:H25 PRJNA230969 SRP058582 SAMN04992123 SRS1590060 2016+AC0-07+AC0-29 2015+AC0-01+AC0-01 ESC+AF8-EA2131AA Assembled 126 115464 4714849 Escherichia coli / Shigella+ADs-92.57+ACU- …
MOD1+AC0-EC6776 SRR3957099+ADs-ILLUMINA+ADs-Paired+ADs-300+ADs-SRX1981159 Human Human Homo sapiens+ADs- homo sapiens+AC0-Intestine 1994 2 Africa Zambia FDA Center for Food Safety and Applied Nutrition Escherichia coli O85:H10 PRJNA230969 SRP058582 SAMN04992124 SRS1588603 2016+AC0-07+AC0-28 2015+AC0-01+AC0-01 ESC+AF8-EA1695AA Assembled 82 96339 5020428 Escherichia coli / Shigella+ADs-94.11+ACU- 15…
MOD1+AC0-EC6777 SRR3974858+ADs-ILLUMINA+ADs-Paired+ADs-300+ADs-SRX1984797 Human Human Homo sapiens+ADs- homo sapiens+AC0-Intestine 1994 2 Africa Zambia FDA Center for Food Safety and Applied Nutrition Escherichia coli O21 PRJNA230969 SRP058582 SAMN04992125 SRS1590061 2016+AC0-07+AC0-29 2015+AC0-01+AC0-01 ESC+AF8-EA2130AA Assembled 72 115269 5141953 Escherichia coli / Shigella+ADs-100.0+ACU- 151 3…
MOD1+AC0-EC6778 SRR3974859+ADs-ILLUMINA+ADs-Paired+ADs-300+ADs-SRX1984798 Human Human Homo sapiens+ADs- homo sapiens+AC0-Intestine 1994 2 Africa Zambia FDA Center for Food Safety and Applied Nutrition Escherichia coli O102 PRJNA230969 SRP058582 SAMN04992126 SRS1590062 2016+AC0-07+AC0-29 2015+AC0-01+AC0-01 ESC+AF8-EA2129AA Assembled 58 90081 5376019 Escherichia coli / Shigella+ADs-97.23+ACU- 186 7…
MOD1+AC0-EC6779 SRR3957100+ADs-ILLUMINA+ADs-Paired+ADs-300+ADs-SRX1981160 Human Human Homo sapiens+ADs- homo sapiens+AC0-Intestine 1994 2 Africa Zambia FDA Center for Food Safety and Applied Nutrition Escherichia coli O153:H2 PRJNA230969 SRP058582 SAMN04992127 SRS1588604 2016+AC0-07+AC0-28 2015+AC0-01+AC0-01 ESC+AF8-EA1694AA Assembled 85 99960 5140774 Escherichia coli / Shigella+ADs-96.42+ACU- 19…
ROAR8 SRR4241870+ADs-ILLUMINA+ADs-Paired+ADsAOw-SRX2162771 Human Human Cephalophus sylvicultor+ADs- Faeces 2009 Africa Gabon Australian National University Escherichia coli PRJNA342583 SRP089829 SAMN05763407 SRS1690811 2016+AC0-09+AC0-17 2016+AC0-09+AC0-16 ESC+AF8-EA5795AA Assembled 44 56131 5117890 Escherichia coli / Shigella+ADs-97.39+ACU- 175 40181 ESC+AF8-IA2001AA+AF8-AS 3.51
